# Supplementary material for: Isolation and Characterization of the Sulfate Transporter Gene Family and Its Expression Pattern in Response to Selenium and Abiotic Stress in Walnuts (Juglans regia L.)
Source: MDPI journal article supplement (doi:10.3390/f15040702), 2024-04-15
Supplement: s1 [file s1]

**Table S2.** Primer sequences used for qRT-PCR

| Gene name   | Forward primer            | Reverse primer          |
|-------------|---------------------------|-------------------------|
| 18S rRNA    | TCGCATTTTCGCTACGTTCTT     | GGTCAATCTTCTCGTTCCTT    |
| GAPDH       | ATTTGGAATCGTTGAGGGTCTTATG | AATGATGTTGAAGGAAGCAGCAC |
| JrSULTR1.1a | AGCAATAGCAGCAACCCAAA      | TTGGTGTCGTGGCGGGTATG    |
| JrSULTR1.1b | CTCGCAATCTCCATCTCGTCA     | ATGAGCCTTTACGCCCTTAC    |
| JrSULTR1.2a | GAAACCCAACCTGAAGAACC      | CTCTTGCTGGGCACCCTACT    |
| JrSULTR1.2b | CATCCATGATTAAGTGAAGCC     | GATTATTCAGGTTGGGTTC     |
| JrSULTR2.1  | GACGAGAAAGATCGCCCAAC      | CCGCAGGTTGGAGAAGTGGC    |
| JrSULTR2.2  | GAATGAACAACCAAGGACGA      | AGCCATTATCATTGGTCTTC    |
| JrSULTR3.1a | GGGTAAAGACAGAACGCAAC      | TTGCTTTCACGGCGACATTC    |
| JrSULTR3.1b | CGATAGTAATCCCAGCAATAA     | ATGCTAAGGAGAATCCCACG    |
| JrSULTR3.2a | ATGAGAAGGGATGCCACAGC      | TTGCCAGTTTAGCAGTCCCT    |
| JrSULTR3.2b | ATTGTTAGCGATTGGGTATT      | GTGGTCTTTGGCAGTGTGA     |
| JrSULTR3.3  | CAGTTTGTCCATAACCTCCC      | GCTACGACAGTCCCTGGTTT    |
| JrSULTR3.4a | AAATACACCAGCAAAGAAGG      | AGTCTTCTGAGGTCCGATGT    |
| JrSULTR3.4b | AACTTCCAAGGATGGCGTAT      | ACCTTCTTTGCTGGTGTATT    |
| JrSULTR3.4c | TCGGACCTCAGAAGACTAAC      | ACTAAAGCACAGGGTCTCCG    |
| JrSULTR3.5a | ACACCGAAGAAGGCAGTCAT      | GCTGCTGTTCTTGGCTCCTC    |
| JrSULTR3.5b | AGTTGAGTTTGGCACTTTCC      | TGGCTGCCTTCTTCGGTGTT    |
| JrSULTR4.1  | TTTGCTGATTCGTGGATGAC      | GTCTGGTGGATTACAATGAGG   |
