# Supplementary material for: Isolation and Characterization of the Sulfate Transporter Gene Family and Its Expression Pattern in Response to Selenium and Abiotic Stress in Walnuts (Juglans regia L.)
Source: MDPI journal article supplement (doi:10.3390/f15040702), 2024-04-15
Supplement: s1 [file s1]

**Table S1.** Gene sequences of *JrSULTR* genes.

| Gene ID     | Gene sequence                                                                                                                                                                                                                                                                                                                                                                                                                                                                                                                                                                                                                                                                                                                                                                                                                                                                                                                                                                                                                                                                                                                                                                                                                                                                                                                                                                                                                                                                                                                                                                                                                                                                                                                                                                                                                                                                                                                                                                                                                                                                                                                                                              |
|-------------|----------------------------------------------------------------------------------------------------------------------------------------------------------------------------------------------------------------------------------------------------------------------------------------------------------------------------------------------------------------------------------------------------------------------------------------------------------------------------------------------------------------------------------------------------------------------------------------------------------------------------------------------------------------------------------------------------------------------------------------------------------------------------------------------------------------------------------------------------------------------------------------------------------------------------------------------------------------------------------------------------------------------------------------------------------------------------------------------------------------------------------------------------------------------------------------------------------------------------------------------------------------------------------------------------------------------------------------------------------------------------------------------------------------------------------------------------------------------------------------------------------------------------------------------------------------------------------------------------------------------------------------------------------------------------------------------------------------------------------------------------------------------------------------------------------------------------------------------------------------------------------------------------------------------------------------------------------------------------------------------------------------------------------------------------------------------------------------------------------------------------------------------------------------------------|
| JrSULTR1.1a | >ATGGAGATTGCGAGCGGCCCTTCGTCCC GCGCCACTCAGGGCGTTTGCCCC<br>ATATTCACAAGGTGGAACGACCTCCAAAGCAAATCTTCTGAGAGATATTCA<br>AGATTCCTTGAAGGAACTTTATTCTCGGATGAGCCTTTACGCCCTTACAAGG<br>ACCAACC GGTCCGAGAAAATTTCTTATTTTCCTCCAACATTTCTTTCCCATTC<br>TTGAATGGGGAAGAACTTACAATCTTTCCAAATTCAAAGGTGACCTTATCGCC<br>GGGCTTACTATTGCCAGTTTGTGTGTTTCCTCAGGATATTGCATATGCAAAGCTT<br>GCAAATCTGGAACCCCAATATGGGTTGTA CTCAAGCTTTGTTCCACCTCTTATT<br>TATGCTTTCATGGGTAGCTCGAGAGATATTGCCATTGGACCAGTGGCTGTCGTG<br>TCTCTGTTGCTTGGGACACTGCTGCAGAATGAGATCCCAGATTCACAAGCTAA<br>TAAACTTGCTTATAGGCGTCTAGCATTACCGCTACCTTCTTCGCTGGCATCAC<br>TCAATTCGCACTTGGTTTTTTCAGATTGGGTTTCTTAATCGACTTTCTTTCCCAT<br>GCCGCCATTGTCGGGTTTCATGGCTGGAGCTGCTGTTACCATAGCCCTTCAACA<br>GCTCAAAGGTCTTCTCGGTATAAAAACTTCACGAAGAAGACTGACATCGTTT<br>CTGTTATGCGCTCAGTTTGGAGCGCAGCACATCACGGGTGGAAGTGGCAGAC<br>TATGGTCATAGGATTGTCATTCTTGGCATTCTTCTGTTTACCAAGTACATCGGA<br>AAAAAAGAACAAGAAATCTTTTGGGTTGCTGCTATTGCTCCTTTGTCCTCTGTT<br>GTAATTGCCACCTTTTTTCGTGGGTATCACCCATGCGGAAAAGCAAGGTGTTTC<br>AATTGTAAGACATATAGATAGGGGCATCAATCCATCCTCTTTTCATGAAATCCA<br>TTGGACTGGAGAATTTCTTCTCAAAGGTCTTAGGATTGGTGTCTGTCGGGGTAT<br>GGTAGCTCTAACGGAAGCTGTAGCAATCGGAAGAACATTTGCTGCAATGAAG<br>GACTACCAGCTGGATGGAAACAAAGAAATGGTGGCACTGGGAAGTATGAAC<br>ATTGTTGGTTCCATGACATCTTGCTATGTAGCTACAGGATCCTTCTCTCGCTCAG<br>CAGTAAATTTTCATGGCCGGCTGCAAAACAGCCGTTTCCAACATCGTGATGTCT<br>TGTGTTGTTCTTCTAACTTTGGTACTCATCACCCCATTTGTTCAAGTACACCCCG<br>AATGCTGTACTTGCTTCCATCATCATAGCTGCTGTGGTAGGCCTAGTTGACATC<br>GGAGCTGTAATACTGCTATGGAAGATTGACAAATTCGATTTCTGTTGCTTGCATG<br>GGTGCCTTCTTTGGAGTAATTTTAAAAGCGTTGAGATAGGTCTCCTAATTGCA<br>GTCGCAATATCCTTTGCCAAAATCCTCCTGCAAGTCACCAGGCCACGAACTGC<br>ATTACTTGGGAAGCTCCCAGGAACAAATGTTTACAGGAATGTGGAGCAATATT<br>CCAATGCAACAACCTGTTCTTGGCATTCTGATCATCAGAGTTGATTCTGCAATTT<br>ACTTTTCAAACCTCCAACCTACATTAAGGAGAGGATTTTAAGATGGCTAGGCAAT<br>GAAGAGGAAGAAGCAAAGAAACTAAACCAATCCGGAATCCAATTCATTGTC<br>ATTGAAATGTCACCTGTTACTGATATTGACACTAGTGGGATCCATTCCTTCGAA<br>GAATTACATAAGACTCTTCAGAACAGAGAATTGCAGCTTGTTTTAGCAAACCC<br>TGCTCCAATAGTGATTGAAAAGCTGTACGAGTCCAAGTTCGTAAACTTAATCG<br>GCGAGGACAACATCTTCCTATCCGTTGCAGACGCTGTCACAACACTCACTCCA<br>AAAACTCAAGAACCTGCATGA |
| JrSULTR1.1b | >ATGAGTAGGCGTGTGGTGACGAGATGGAGATTGCGAGCGGCCCTTCGTCCC<br>GGCGCCACTCAGGGCGTTTGCCCCATATTCACAAGGTGGAACGACCTCCAAA<br>GCAAATCTTCTGAGAGATATTCAAGATTCCTTGAAGGAACTTTCTTCTCGG<br>ATGAGCCTTTACGCCCTTACAAGGACCAACCGGGTCCGAGAAAGTTTCTTCTT<br>TTCCTCCAACATTTCTTTCCCATCTTGAATGGGGAAGAACTTACAATCTTTCC                                                                                                                                                                                                                                                                                                                                                                                                                                                                                                                                                                                                                                                                                                                                                                                                                                                                                                                                                                                                                                                                                                                                                                                                                                                                                                                                                                                                                                                                                                                                                                                                                                                                                                                                                                                                                                                                                      |

|             |                                                                                                                                                                                                                                                                                                                                                                                                                                                                                                                                                                                                                                                                                                                                                                                                                                                                                                                                                                                                                                                                                                                                                                                                                                                                                                                                                                                                                                                                                                                                                                                                                                                                                                                                                                                                                                                                                                    |
|-------------|----------------------------------------------------------------------------------------------------------------------------------------------------------------------------------------------------------------------------------------------------------------------------------------------------------------------------------------------------------------------------------------------------------------------------------------------------------------------------------------------------------------------------------------------------------------------------------------------------------------------------------------------------------------------------------------------------------------------------------------------------------------------------------------------------------------------------------------------------------------------------------------------------------------------------------------------------------------------------------------------------------------------------------------------------------------------------------------------------------------------------------------------------------------------------------------------------------------------------------------------------------------------------------------------------------------------------------------------------------------------------------------------------------------------------------------------------------------------------------------------------------------------------------------------------------------------------------------------------------------------------------------------------------------------------------------------------------------------------------------------------------------------------------------------------------------------------------------------------------------------------------------------------|
|             | AAATTCAAAGGTGACCTTATCGCCGGGCTTACTATTGCCAGTTTGTGTGTTCTT<br>CAGGATATTGCATATGCAAAGCTTGCAAATCTGGAACCCCAATATGGGTTGTA<br>CTCTAGCTTTGTTCCACCTCTTATTTATGCTTTCATGGGTAGCTCGAGAGATATT<br>GCCATTGGGCCAGTGGCTGTCTGTCTCTGTTGCTTGGGACACTGCTGCAGAA<br>TGAGATCCCAGATTCAACAAGCTAACAACCTTGCTTATCGGCGTCTAGCATTCA<br>CCGCTACCTTCTTCGCTGGCATCACTCAATTTCGCACTTGGTTTTTCAGATTGG<br>GTTTCTTAATCGACTTTCTTTCCCATGCCGCCATTGTCGGGTTTCATGGCTGGAG<br>CTGCTGTTACCATAGCCCTTCAACAGCTCAAAGGTCTTCTCGGTATAAAAAAC<br>TTCACGAAGAAGACTGACATCGTTTCTGTTATGCGCTCAGTTTGGAGCGCAGC<br>ACATCACGGGTGGAAGTGGCAGACTATGGTCATAGGATTGTCATTCTTGGCAT<br>TCCTTCTGTTTACCAAGTACATCGGAAAAAAGAACAAGAAATTCTTTTGGGTT<br>GCTGCTATTGCTCCTTTGTCTCTGTTGTAATTGCCACCTTTTTCGTGGGTATCA<br>CCCATGCGGAAAAGCAAGGTGTTTCAATTGTAAGACATATAGATAGGGGCATC<br>AATCCATCCTCTTTTCATGAAATCCATTGGACTGGAGAATTTCTTCTCAAAGGT<br>CTTAGGATTGGTGTCTGTGGCGGGTATGGTAGCTCTAACGGAAGCTGTAGCAAT<br>CGGAAGAACATTTGCTGCAATGAAGGACTACCAGCTGGATGGAAACAAAGA<br>AATGGTGGCACTGGGAAGTATGAACATTGTTGGTTCATGACATCTTGCTATGT<br>AGCTACAGGATCCTTCTCTCGCTCAGCAGTAAATTTTCATGGCCGGCTGCAAAA<br>CAGCCGTTTCCAACATCGTGATGTCTTGTGTTGTTCTTCTAACTTTGGTACTCAT<br>CACCCCATTTGTTCAAGTACACCCCGAATGCTGTACTTGCTTCCATCATCATAGC<br>TGCTGTGGTAGGCCTAGTTGACATCGGAGCTGTAATACTGCTATGGAAGATTG<br>ACAAATTCGATTCGTTGCTTGCAATGGGTGCCTTCTTTGGAGTAATTTTAAAA<br>GCGTTGAGATAGGTCTCCTAATTGCAGTCGCAATATCCTTCGCCAAAATCCTCC<br>TGCAAGTCACCAGGCCACGAACTGCATTACTTGGGAAGCTCCAGGAACAAA<br>CGTTTACAGGAATGTGGAGCAATATTCCAATGCAACAACCTGTTCTTGGCATTCT<br>TGATCATCAGAGTTGATTCTGCAATTTACTTTTCAAACCTCCAACCTACATTAAGG<br>AGAGGATTTTAAGATGGCTAGGCAATGAAGAGGAAGAAGCAAAGAAACTAA<br>ACCAATCCGGAATCCAATTCATTGTCATTGAAATGTCACCTGTTACTGATATTG<br>ACACTAGTGGGATCCATTCTTCGAAGAATTACATAAGACTCTTCAGAACAGA<br>GAATTGCAGCTTGTTTTAGCAAACCCAGCTCCAATAGTGATTGAAAAGCTGTA<br>CGAGTCCAAGTTCGTAAACTTAATCGGCGAGGACAACATCTTCTATCCGTTG<br>CAGACGCTGTCACAACACTCACTCCAAAACTCAAGAACCTGCATGA |
| JrSULTR1.2a | >ATGGATACCAGAAGTCTATCATCCTCACGCCATCCATCACTGAACATTCACA<br>AGGTGGGAGTTCCCCCAAGCAAAATCTTTCAAGGAATTCAAAGCTACTGT<br>GAAAGAAACACTCTTTTCAGATGATCCTTTACGTCCCTTTAAGGATCAATCTGG<br>GTCTCGCAAATTCATTTTAGGCATCCAGGCCATTTTCCCATAATTTGAGTGGGG<br>TAGAAGGTACAACCTAACCAAATTCAGGGGGGATCTTATTGCAGGACTCACTA<br>TTGCAAGTCTCTGCATTCCTCAGGACATTGGATACGCAAAGCTTGCAAATTTG<br>GCTCCACAATATGGATTGTATTCCAGCTTTGTTCCACCATTGATTTATGCCTTCA<br>TGGGTAGTTCAAGAGATATAGCCATAGGACCTGTGGCCGTGGTCTCTCTTGC<br>TGGGCACCCTACTTCAAATGAGATCGACCCCATTAACAATCCTACAGAGTAT<br>CGGCGGCTTGCAATCACAGCTACATTTTTTGCTGGAATCACTCAAGCCACCCT<br>AGGGTTCTTCAGGTTGGGTTTCTTGATTGACTTCCTATCCCATGCTGCCATTGTC<br>GGTTTTATGGGTGGAGCTGCCATCACTATTGCACTCCAACAGCTTAAAGGTTTT                                                                                                                                                                                                                                                                                                                                                                                                                                                                                                                                                                                                                                                                                                                                                                                                                                                                                                                                                                                                                                                                                                                                                                                         |

|             |                                                                                                                                                                                                                                                                                                                                                                                                                                                                                                                                                                                                                                                                                                                                                                                                                                                                                                                                                                                                                                                                                                                                                                                                                                                                                                                                                                                                                                                                                             |
|-------------|---------------------------------------------------------------------------------------------------------------------------------------------------------------------------------------------------------------------------------------------------------------------------------------------------------------------------------------------------------------------------------------------------------------------------------------------------------------------------------------------------------------------------------------------------------------------------------------------------------------------------------------------------------------------------------------------------------------------------------------------------------------------------------------------------------------------------------------------------------------------------------------------------------------------------------------------------------------------------------------------------------------------------------------------------------------------------------------------------------------------------------------------------------------------------------------------------------------------------------------------------------------------------------------------------------------------------------------------------------------------------------------------------------------------------------------------------------------------------------------------|
|             | <p>CTTGGAATAAAAAAGTTTCACAAAGAAAACCTGATATTATCTCTGTAATGCACTC<br/> AGTATGGGGCTCAGTCAATCATGGATGGAACCTGGCAGACTATACTTATTGGAG<br/> CAACCTTTTTAAGTTTTCTGCTGTTTGCTAAATACATGGGAAAAAGGAACAAG<br/> AAGCTCTTCTGGTTACCTGCAATTGCCCCATTGATATCTGTTGTTCTGTCCACCT<br/> TTTTGTGTATATAACCCATGCAGAAAAGAATGGTGTGCAATTGTGAAACATA<br/> TAGAGAAAGGAATTAATCCCTCGTCGGTTAATGAGATATATTTCCATGGTGAAT<br/> ATCTTGGCAAAGGTTTTAGGATTGGGATGGTGGCCGGTATGATAGCATTGACG<br/> GAAGCCATAGCAATTGGAAGAACATTTGCTTCCATGAAAGACTATCAACTTGA<br/> TGGAACAAAGAAATGGTGGCACTAGGAGCAATGAATATTGTTGGTTCAATG<br/> ACTTCCTGCTATGTTGCGACAGGTTCACTTCACGGTCAGCTGTGAATTACATG<br/> GCTGGCTGCCAACTGCAGTCTCCAACATTGTGATGTCCTGCGTTGTTATCCTA<br/> ACCTTGGAATTCATCACACCTCTTTTCAAGTACACACCAAATGCCATTCTCTCT<br/> GCCATCATCATATCAGCTGTGATCAACCTAATTGACTTTCAAGCAGCAATCCTG<br/> ATATGGAAGATTGATAAATTTGATTTTGTGCTTGTGTTGGGAGCCTTCTTTGGAG<br/> TAATTTTTTCCTCTGTTGAGATAGGCCTCTTAATTGCGGTCTCAATATCCTTTGC<br/> TAAAATCCTATTACAAGTTACCAGGCCAAGGACTGCAATTCTTGGAAGATT<br/> CCTAGGACCGCTGTGTACAGAAATATCCAACAATATCCAGATGCAACTAAAGT<br/> TCCAGGTGTTCTGATTGTGAGAATTGATTCAGCAATTTACTTTTCCAACTCCAA<br/> TTATGTTAAGGAGAGGATATTAAGGTGGTTGACAAATGAGGAAGAACAAAAG<br/> AAAGCGGACTACCAACCAAGAATCCAAATTTTGATAGTTGAGATGTCACCTGT<br/> TACAGACATTGACACCAGTGGCATTGATGCTTGGAAAGAACTATATAGGAGTC<br/> TCCAGAAGAGAGACGTTGAGCTCATTCTGGCGAATCCTGGGCCAGTGGTGATT<br/> GACAAGCTCCACGCTTCCAACCTTACAAACGTGATTGGCGAGGACAAAATCT<br/> TCCTCACAGTTGCAGACGCTGTCTCCTCCTGTTCTCCAAAGTTGGTTGAAGAA<br/> GCTTGA</p> |
| JrSULTR1.2b | <p>&gt;ATGGGTCATTCAAGTAATGAGGAACTTGAAACAAAAGATATAGACACCAGA<br/> AGTCTGTATCCTCACGCCATCAGTCACAAAACCTCCCACTCATTACAAAGGT<br/> GGGAGTTCCCCCAAGCAAAATCTCATCAATGAATCAAAGCCACCATGAAA<br/> GAAACACTCTTTTCAGACGATCCCTTACGTCCCTTTAAGGATCAACCTAGGTCT<br/> CGAAAGTTCATCTTAGGCATCCAAACAATTTTCCCCATATTTGAGTGGGGGAG<br/> AAAGTACAACCTAACTAAATTAAGAGGGGATCTTATCGCAGGACTCACTATTG<br/> CAAGTCTCTGCATTCCTCAGGACATTGGATATGCAAAGCTTGCAAATTTGGCC<br/> CCACAATATGGATTGTATCCAGCTTTGTTCCACCTTTGATTTATGCCTTCATGG<br/> GTAGTTCAAGAGATATTGCCATAGGACCTGTGGCTGTGGTGTCTCTCTTGCTGG<br/> GAACGCTTCTTCAGAATGAGATTGATGCCCATACAGATCCAATAGGGTACCGG<br/> CGGCTTGCTTTCACGGCTACTTTTTTTGCAGGAGTCACTCAAGCCACCTTAGG<br/> ATTATTCAGGTTGGGTTTCTTGATTGACTTCCTATCCCATGCTGCCATTGTGGT<br/> TTTATGGGTGGCGCCGCGCATCACTATTGCACTCCAACAGCTTAAGGGTTTTCTG<br/> GGCATAAAAACGTTACAAAGAAAACCTGATATTGTCTCTGTAATGCACTCAGT<br/> ATGGGGCTCAGTTAATCATGGATGGAACCTGGCAGACTATACTTATTGGAGGCA<br/> CCTTTTTGAGTTTTCTTCTATTGCTAAATACATAGGAAAAAAGAACAAGAAG<br/> TTCTTCTGGGTACCTGCAATTGCTCCATTAGTATCTGTGATCCTGTCCACCTTTT<br/> TTGTGTATATAACCCATGCTGAAAAGAAAGGTGTTGAAATTGTGAGACATATA<br/> GAGAAAGGAATTAATCCCTCATCAGTGAATCAAATATATTTACGCGGTGAATA</p>                                                                                                                                                                                                                                                                                                                    |

|            |                                                                                                                                                                                                                                                                                                                                                                                                                                                                                                                                                                                                                                                                                                                                                                                                                                                                                                                                                                                                                                                                                                                                                                                                                                                                                                                                                                                                                                                                                                                                        |
|------------|----------------------------------------------------------------------------------------------------------------------------------------------------------------------------------------------------------------------------------------------------------------------------------------------------------------------------------------------------------------------------------------------------------------------------------------------------------------------------------------------------------------------------------------------------------------------------------------------------------------------------------------------------------------------------------------------------------------------------------------------------------------------------------------------------------------------------------------------------------------------------------------------------------------------------------------------------------------------------------------------------------------------------------------------------------------------------------------------------------------------------------------------------------------------------------------------------------------------------------------------------------------------------------------------------------------------------------------------------------------------------------------------------------------------------------------------------------------------------------------------------------------------------------------|
|            | <p> TCTTGGAAAAGGTTTTAGGATTGGTATCGTGGCTGGAATGATAGCATTGACGG<br/> AAGCAATAGCAATCGGAAGAACATTTGCTTCCATGAAAGACTATCAACTTGAT<br/> GGCAACAAAGAAATGGTGGCACTAGGATCAATGAATATCGTTGGTTCGATGA<br/> CTTCCTGTTATGTGGCAACAGGTTCCTTTTCTCGGTGAGCTGTGAATTACATGG<br/> CAGGCTGTGAAACTGCAGCCTCAAACATTGTGATGTCTTTTGTGTTATCCTAA<br/> CCTTGGGAATTCATCACACCTCTTTTAAGTACACACCGAATGCCATTCTTTCTG<br/> CCATCATCATATCTGCTGTGATCAATCTAATCGACTTCCAAGCAGCAATTCTGA<br/> TATGGAAGATTGATAAATTTGATTTTGTGCTTGTGTTGGGAGCCTTCTTTGGTGT<br/> AATTTTCTCCTCTGTTGAGATAGGCCTCTTAATTGCGGTCTCAATATCCTTTGCT<br/> AAAATCCTCTTACAAGTCACCAGACCAAGAAGTGAATCCTTGGAATATTCC<br/> TAGAACGGCAGTGTACAGAAACATCCAACAATATCCAGATGCAACTAAAGTT<br/> CCAGGCATTCTGATTGTGAGAGTTGATTGCGCAATTTACTTTTCTAACTCCAAT<br/> TATGTTAAGGAGAGGATATTAAGGTGGTTGACGGATGAGGAAGAACAGAAAA<br/> AAGGAGACTACCAACCTAGAATCCAATTTTGTGATTGTTGAGATGTCCCCTGTG<br/> ACTGACATCGACACCAGTGGCATTGATGCCCTAGAAGAACTATATAGGAGTCT<br/> CCAGAAGAGAGAAGTTCAGCTCATTCTGGCAAATCCTGGGCCTGTGGTGATT<br/> GACAAGCTCCACGCTTCCACGTTTGCAAACCTGATTGGTGAGGACAAAATCTT<br/> CCTCACAGTTGCAGAAGCTGTCTCATCCTGTTCTCAAAGATGGTGAAGAAG<br/> CTTGA </p>                                                                                                                                                                                                                                                                                                                                                                                                                  |
| JrSULTR2.1 | <p> &gt;ATGGCTGCTCCAGCCATGGAGACCTTCACACTGGAGGAAATTGTTCTCCAA<br/> ACACTTCAAATATGGCTGCTCCTGCCATGGAGACCTTCACACCGGAGGAAATT<br/> CCAGACCTTGAGAAGAGTAGCCAAGCCGAAAGGGCTCAGTGGGTGTTGAAT<br/> GCACCCGAACCCCAAGTCCATGGCGTGAGCTGATTCAATTCTGTAAGGGAAA<br/> CCCTTTTAGGGCCTTGTGGAACAAGTTATTGGCCCTCAAGAATCAGCCCGGA<br/> CCGGAACAAGTTGTTTTGTTCTTGCAAGGGATATTCCTATCCTTGTGTTGGTGTC<br/> GAAGCTACACGGTGACAAAATTTAAGAACGATTTACTGGCGGGTCTAACTATT<br/> GCTAGCCTCTGCATTCCCCAGAGTATTGGATATGCAACTTTAGCAAAACTTGAT<br/> CCTCAATATGGTCTCTACACAAGTGTGGTACCGCCTCTTATTATGCTGTAATG<br/> GGGACTTCAAGAGAGATAGCTATTGGACCCGTAGCTGTGGTTTCACTGCTTTT<br/> GCCCTCAATGATTCAAAAATTACAAGATCCTGTGGCTGATCCAGTTTCCTACA<br/> CAAAGCTTGTTTTGACAGCAACTTTCTTTGCGGGAATCTTTCAAACCTGCCTTTG<br/> GACTTTTCAGATTAGGATTTCTTGTGGATTTCTCTCCCATGCTGCTATTGTCCG<br/> GTTTGTGGCTGGAGCGGCCATAGTAATTGGCCTTCAACAACCTGAAGGGACTTC<br/> TTGGGATCAGTCACTTCACCAACAAGACTGATGTAATATCAGTCGGGGAAGC<br/> AGTTTGGAGATCAGTTCATCATCATTGGAGTCCTTACAATTTATCCTTGGGTG<br/> CTATTCTGAGTTTCATCCTATTTACTCGATTTCTGGGTAGAAGGAAAAAGAG<br/> ACTCTTCTGGTTGCCAGCCATTGCTCCTCTCCTATCTGTTATATTATCGACTCTA<br/> ATTGTTTTTCTGACAAGAGCGGACACACATGGCATTAAAATTGTAACACAT<br/> CAAAGGAGGCCTCAACCAAGCTCACTTCATCAGTTACAGCTCGATGGCCCG<br/> CAGGTTGGAGAAGTGGCAAAAGCTGGACTGGTTGTTGCCGTTGTTGCACTCA<br/> CGGAAGCGATTGCAGTTGGGCGATCTTTCTCGTCAATAAAAGGATACAACATT<br/> GATGGAACAAAGAAATGGTTGCCATTGGCTTCATGAACGTCATAGGTTCTTT<br/> CACTTCTTGCTATGTTGCCACCGGTTCACTCTCACGCACTGCCGTAAATTTAG<br/> TGCTGGTTGTGAAACTTTAGTATCGAATATTGTGATGGCAATTACAGTGATCAT </p> |

|            |                                                                                                                                                                                                                                                                                                                                                                                                                                                                                                                                                                                                                                                                                                                                                                                                                                                                                                                                                                                                                                                                                                                                                                                                                                                                                                                                                                                                                                                                                                                                                                                                                                                                                                                                                                                                                                                |
|------------|------------------------------------------------------------------------------------------------------------------------------------------------------------------------------------------------------------------------------------------------------------------------------------------------------------------------------------------------------------------------------------------------------------------------------------------------------------------------------------------------------------------------------------------------------------------------------------------------------------------------------------------------------------------------------------------------------------------------------------------------------------------------------------------------------------------------------------------------------------------------------------------------------------------------------------------------------------------------------------------------------------------------------------------------------------------------------------------------------------------------------------------------------------------------------------------------------------------------------------------------------------------------------------------------------------------------------------------------------------------------------------------------------------------------------------------------------------------------------------------------------------------------------------------------------------------------------------------------------------------------------------------------------------------------------------------------------------------------------------------------------------------------------------------------------------------------------------------------|
|            | <p>ATCATTGCAATTATTACAAGGCTCTTATATTTCACTCCAATAGCAATCCTTGCT<br/> TCAATAATTCTATCTGCTCTTCCGGGACTCATTGACCTCAATGCAGCTTACAAT<br/> ATTTGGAAGATTGATAAGCTAGATTTCTTACTTGCATCGCTGCATTCTTCGGTG<br/> TGTTGTTTGTATCCGTGGAGATTGGCCTTCTAGTTGCGGTAGCAATATCGTTTGC<br/> AAAGATTATTCTCATATCAATTCTACCAGGCACAGAAACCTAGGACGAATTC<br/> CTGGAACGATATGTTCTGTGACATCAATCAATATCCCATGGCTTCAAAGACTT<br/> CTGGGGTCGTAATAATCCGTGTCAAGTCCGCCGTGATTTGTTTTGCAATGCTA<br/> ATATCATTAAGAAAGCATTATGAGATGGGTACTGAAGATCAAGCGGAGGAT<br/> ACAAAATTAGCAAATGTAAAAGGTCATAATTTATAAACTCGTAATTCTGGAC<br/> ACATCCGGCCTAATGGACGTCGACACATCAGGCATTGCTAGTCTGCAGGAGTT<br/> GCATAAGAATCTCACTTCACATGGAATCGAGTTAGCCATTGCCAATCCAAGGT<br/> GGCAAGTCATTACAAGCTAAGGTTAGCAAACCTTTGTGAGCAAGATTGGAGG<br/> AAGGGTCTACTTGACTGTGGGAGAAGCTGTGGGCGCAGCAGCTCCTGATGCA<br/> GAAAGGGCTAATATTCAAGCGTGA</p>                                                                                                                                                                                                                                                                                                                                                                                                                                                                                                                                                                                                                                                                                                                                                                                                                                                                                                                                                                                                                  |
| JrSULTR2.2 | <p>&gt;ATGATCAGTTCAGTTCCAACCTGAGACCTTCAGTGTGGAGACTCGGCAGCTCG<br/> ACATCGAGGATGCTAGTCCGGCTCCGAGGGCTGAATGGGTGCTCAATTCTCCT<br/> GACCCACCAGGTCTATGCCAAGAGCTCCTAGGTTCAATCAAAGAGACAGTCT<br/> TTCCTAACAGAAAGAAGCCATCTTCATCCTCCAAGATGAAGAATCCATGGAG<br/> ATGTGCTGTGGCTTCATTCTGCAGGGTCTATTTCCCATCCTCAGCTGGGGAAA<br/> GAATTACAAGGCTTCAACGTTTAAAAGCGATCTGATGGCTGGTTTGACACTGG<br/> CTAGCCTTAGCATTCTCAGAGTATAGGATACGCTAGTTTAGCAAAACTTGATC<br/> CTCAATATGGCCTATACACAAGCGTTGTCCCTCCTCTGATTTATGCTCTAATGG<br/> GGAGCTCAAGAGAGCTAGCTATTGGACCAGTAGCTGTTGTTTCCATGCTGCTC<br/> TCCTCCATGGTTCAGCAAATACAAGATCCTATGGCTGATCCATTGCTTATAGA<br/> AAACTCATTTTCACAGTGACCTTCTTCGCCGGAACCTTCCAAGCTCTATTTGGA<br/> ATATTCAGATTGGGATTCTTGTGGACTTCTTTTACATGCTGCCATTGTTGGAT<br/> TCATGGCGGGTGCAGCCATTATCATTGGTCTTCAACAGCTAAAAGGGCTACTT<br/> GGGATTAGTCACTTCACCGTCAAAACAGATGTGGTGTGGTCTTAGAGTCTGT<br/> TGTTAGATCAATTAACGATGAATTGTACCCACTGAATTCGTCCTTGGTTGTTT<br/> ATTCTGATCTTCTCCTATTTACTAGATTTCTAGGCAGGAGAAACAAGAACCT<br/> CTTCTGGTTGCCTGCTATTGCTCCTTTGATATCAGTAATGTTATCCACTTTGATTG<br/> TGTTTTTGACAAAAGCTGATAAGCACGGAGTTAATATTATAAAAAACATC<br/> AAAAGGGGAGTAAATCAAAGTTCAAGTTCATCAATTACAATTTAAAGGTCCAC<br/> ATGTTGGACAAGCAGCAAAAGTTGGACTAGTTTCTGCAATTATTGCTCTCACG<br/> GAAGCCATCGCCGTTGGCAGATCTTTCGCTTCCATTAGGGGCTATCACCTGGAT<br/> GGGAACAAGGAAATGGTAGCCATGGGCTTTATGAACCTAGCAGGATCTTTATC<br/> CTCATGCTATGTGGCAACCGGGTCATTCTCTAGGACAGCGGTAAATGTCAGCT<br/> CAGGATGTCAAACAGTAGTGTCAAATTTAGTGATGGCCATTACTGTGCTTCTGT<br/> CACTGGAATTGCTTACTAGGCTCTTGTACTTCACTCCCATGCAATCCTAGCTT<br/> CAATCATTCTCTCTGCTCTTCTGGACTTATTGACATAAATGAAGCTTACAATAT<br/> CTGGAAGGTCGACAAATTAGATTTCTTGCATGTATTGGTGCATTTCTTGGG<br/> GTCTTGTTTGCATCGGTGGAGATTGGCCTTCTGGTTGCGGTAACAATCTCATTT<br/> GGAAAAATATTACTAAAATCAATTCGACCTGGCATAGAAAAAATGGGGAGAC<br/> TTCCTGGAACAGATATCTTCTGTGACATAAGCCAATACCCGATGGTCATTAAG</p> |

|             |                                                                                                                                                                                                                                                                                                                                                                                                                                                                                                                                                                                                                                                                                                                                                                                                                                                                                                                                                                                                                                                                                                                                                                                                                                                                                                                                                                                                                                                                                                                                                                                                                                                                                                                                                                                                                                                                                                                                                                                                                                                                                                                                                                                                                                                                                                                                                                                                                                                                                                                                                                                                                                                                               |
|-------------|-------------------------------------------------------------------------------------------------------------------------------------------------------------------------------------------------------------------------------------------------------------------------------------------------------------------------------------------------------------------------------------------------------------------------------------------------------------------------------------------------------------------------------------------------------------------------------------------------------------------------------------------------------------------------------------------------------------------------------------------------------------------------------------------------------------------------------------------------------------------------------------------------------------------------------------------------------------------------------------------------------------------------------------------------------------------------------------------------------------------------------------------------------------------------------------------------------------------------------------------------------------------------------------------------------------------------------------------------------------------------------------------------------------------------------------------------------------------------------------------------------------------------------------------------------------------------------------------------------------------------------------------------------------------------------------------------------------------------------------------------------------------------------------------------------------------------------------------------------------------------------------------------------------------------------------------------------------------------------------------------------------------------------------------------------------------------------------------------------------------------------------------------------------------------------------------------------------------------------------------------------------------------------------------------------------------------------------------------------------------------------------------------------------------------------------------------------------------------------------------------------------------------------------------------------------------------------------------------------------------------------------------------------------------------------|
|             | <p>             ACTCCGGCCATCCTGATAATCCGCATCGACTCTGCTTCCATGTGCTTTGTTAAT<br/>             GCTAATTTTCATAAGAGAAAAGGATATTAGGGTTGATGAGAGAAGAAGAAAATA<br/>             AAATGACAGAAAATGCAAATGGAAGTGTCAAGCATTAAATCCTTGACATGTCC<br/>             AACATGATGAACATTGACACTTCAGGAATTATAGCACTAGAGGAAGTGCACA<br/>             GGAAGTTGGTTTCTCATGGCAAAGAATTTGCTCTAGCAAACCCAAGGATG<br/>             CAAGTGATTCACAAGCTGAAGGTGGCTAAATTTGTAGAAAAAGTTGGAAGAG<br/>             GATGGGTTTTCTCTCTGTCTGCGAAGCTGTAGATGCATGTCTCGGTTCTAAAT<br/>             CGGTGAATCTTGACACTTGA           </p>                                                                                                                                                                                                                                                                                                                                                                                                                                                                                                                                                                                                                                                                                                                                                                                                                                                                                                                                                                                                                                                                                                                                                                                                                                                                                                                                                                                                                                                                                                                                                                                                                                                                                                                                                                                                                                                                                                                                                                                                                                                                                                             |
| JrSULTR3.1a | <p>             &gt;ATGGAGTGACGCACCGGGTAGCCATTCCACCCCCACAACCGTTTGTGAAGT<br/>             CACTCAAGTGCTCTCTCAAAGAGACTTTCTTTCCTGATGACCCATTAAGGCAG<br/>             TTCAAGAAGCAGCCACCATCAAGGAAATTCATGCTAGCACTGCACTACTTCTT<br/>             CCCAATCCTCCAATGGGCACCTCGCTATACTTTTGAGTTCCTGAAATCTGATCT<br/>             TGTTTCTGGGATCACCGTTGCTAGTTTGGCAATCCCTCAGGGGATCAGTTATGC<br/>             AAAACTAGCCAATTTGCCTCCTATTCTTGGCCTGTATTCGAGCTTTGTTCCACC<br/>             ATTGGTTTATGCGATGATGGGCAGCTCCAGAGACTTGGCTGTGGGGACTGTAG<br/>             CTGTTCCATCGCTTCTTTTGGCTTCAATGTTGGGGAAGGAAGTTAATGCTAATG<br/>             AGAATCCTAAGCTCTATCTTCACCTTGCTTTCACGGCGACATTCTTCGCCGGT<br/>             GTTTTCCAAGCCTCTTTAGGCTTATTAAGGCTAGGGTTTATCGTGATTTTCTAT<br/>             CGCATGCAACCATAGTAGGGTTCATGGCAGGAGCAGCCACTGTGGTGTGCCT<br/>             GCAACAGCTAAAAGAAATCCTTGGCCTCGACCAATTCACACATGCAACAGAT<br/>             CTTGTGTCAGTGTTGCGTTCTGTCTTTACCCAAACACATGAGTGGAGATGGGA<br/>             AAGCGGTGTTTTGGGATGCTGTTCCCTTTTCTTCTCATCAGCACGAGATACTT<br/>             TAGTAAGAGAAAGCCCCAACTTCTTTTGATATCAGCGATGGCACCGTTGACGT<br/>             CTGTCGTTTTGGGAAGCCTTGTCGTTTATCTAATCCATGCTGAGAAACATGGTG<br/>             TTCAAGTGGTAGGAGAGTTGAAGAAGGGGCTGAATCCAGTGTGCTTGGGGGA<br/>             TCTAGAATTTGTTTCTCCTTATCTCAAAGCAACTATTAACCGGCATCATCAC<br/>             TGGTGTCAATTGGTTTCGCTGAAGGAATAGCAGTAGGAAGAAGCTTTGCAATGT<br/>             TCAAGAATTACCATATTGATGGGAACAAAGAGATGATTGCTTTTGAGTGATG<br/>             AATATTGCTGGTTCTTGACCTCTTGCTACCTCACCACAGGTCCATTTTCAAGA<br/>             GCAGCAGTAAATTACAGCGCAGGATGCAAGACAGCATTTTCAAACATTGTGA<br/>             TGGCAATTGCTGTCATGTTTACATTGTTATTCTTAATCCCTTATTCCACTACAC<br/>             TCCCCTTGTTGTGTTGGCGGCCATAATCATATCAGCAATGCTCTGTCTAATAGAT<br/>             TACGAAGCGGCCATCCATCTATGGCAGGTTGACAAATTCGACTTTGTAGTGTG<br/>             CATTAGTGCATACATTGGAGTGGTTTTCGGCAGCGTCGAGATTGGGCTAGTTAT<br/>             AGCGATGGCAATATCTTTGCTTAGGGTACTTGTATTCAATTGCCAGACCAAGGAC<br/>             CAATGTGCTTGGAACCTTCCAAATTCACCATTTTCAGAAATGTTGAACAAT<br/>             ACCCAAATGCTAGCAATGTTCTGAGTTCTTATACTCCAAATTGATGCTCCCA<br/>             TTTACTTTGTCAATGCAAGCTACTTGAGAGAGAGGATTGCAAGGTGGATCGAT<br/>             GAAGAGGAAGATAGAATAAAATCTTCAGAGGAGACCTGCTTACAGTATGTAA<br/>             TAATGGATATGAGTGCTGTTGGTAACATTGATACTAGTGAATTAGCATGCTTG<br/>             AAGAGATAAAAAAGGCTATTGATAGAAGAGGGATTAAAGCTTGATTAGCCAAT<br/>             CCAGGAGTTGAGGTGATGAAGAAGTTGCACAAGTCCAAGTTTGTTGAAAACA<br/>             TAGGTCAAGAATATATCTACTTGACAGTTGGAGAGGCAGTTGCAGGATGCAAA<br/>             TATATGCTTCAAACATGCAAATCCAACCCTGTGATAGAATCAGAGACATCGAA           </p> |

|             |                                                                                                                                                                                                                                                                                                                                                                                                                                                                                                                                                                                                                                                                                                                                                                                                                                                                                                                                                                                                                                                                                                                                                                                                                                                                                                                                                                                                                                                                                                                                                                                                                                                                                                                                                                                                                                                                                                                                                                                                                                                                                                                                                                                             |
|-------------|---------------------------------------------------------------------------------------------------------------------------------------------------------------------------------------------------------------------------------------------------------------------------------------------------------------------------------------------------------------------------------------------------------------------------------------------------------------------------------------------------------------------------------------------------------------------------------------------------------------------------------------------------------------------------------------------------------------------------------------------------------------------------------------------------------------------------------------------------------------------------------------------------------------------------------------------------------------------------------------------------------------------------------------------------------------------------------------------------------------------------------------------------------------------------------------------------------------------------------------------------------------------------------------------------------------------------------------------------------------------------------------------------------------------------------------------------------------------------------------------------------------------------------------------------------------------------------------------------------------------------------------------------------------------------------------------------------------------------------------------------------------------------------------------------------------------------------------------------------------------------------------------------------------------------------------------------------------------------------------------------------------------------------------------------------------------------------------------------------------------------------------------------------------------------------------------|
|             | CCTCGTCTGA                                                                                                                                                                                                                                                                                                                                                                                                                                                                                                                                                                                                                                                                                                                                                                                                                                                                                                                                                                                                                                                                                                                                                                                                                                                                                                                                                                                                                                                                                                                                                                                                                                                                                                                                                                                                                                                                                                                                                                                                                                                                                                                                                                                  |
| JrSULTR3.1b | >ATGGGTAACGCCGACCATGCGTATCCTTCTAACGTTGAGTGCGCGCACCGTG<br>TTGCGATTCCACCCCCAAAACCCCTTTGTGAAGACGCTGAAGAACTCTCTGAA<br>AGAGACTTTCTTTCCCGATGATCCACTTAGGCAGTTCAAGAACCAGCCACTAT<br>CGAGAAGATTTCGTA CTGGGACTCCAGTACTTCTTGCCAATTCTCGAATGGGCG<br>CCTCGCTATACTTTTGAGTTCCTGAAGTCTGACCTTATTGCTGGGATTACTATCG<br>CCAGCTTGGAATCCCGCAGGGCATCAGTTACGCAAAGCTTGCCAACCTGCCT<br>CCGATTTTGGCCTATATTCGAGTTTGTTCACCTCTGGTTTATGCAATGATGG<br>GCAGCTCCAGAGATTGGCTGTGGGGACTGTTGCTGTTGCATCGCTGCTCACT<br>GCTTCAATGTTGGGGGATGAAGTTGATGCTAAGGAGAATCCCACGCTCTATCT<br>TCACCTTGCTTTCACAGCGACATTCTTCGCCGGAGTTTCCAAGCTTGTTTAGG<br>CTTATTAAGGCTTGGTTTCATCGTGGATTTCCTATCACATGCAACCATAGTAGG<br>GTTCATGGCAGGAGCAGCCACTGTAGTGTGCCTGCAACAATAAAAGCGATC<br>CTTGGCCTTGAGCATTTTACCCAAGGGACAGATCTTGATCAGTGATGCGTTCT<br>GTCTTTAGCCAGACACATAAGTGGAGATGGGAGAGTGGCGTTCTGGGATGTTG<br>TTTCCTTTCTTTCTGATCAGCACTAGATACTTCAGTAAGAGAAAGCCAAAGTT<br>CTTTGGATATCAGCGATGGCACCATTGACGACCGTCATCTTGGGAAGTCTTCT<br>CGTTTATCTCACCCATGCTGAGAAACACGGTGTTCAAGTGATAGGAGAGTTGA<br>AGAAGGGGCTGAATCCACCATCGTTCGGGGATCTAGTTTTTGTGTCTCCCTAT<br>CTCATGGTAGCTATTAAAACTGGCATCATCACTGGCGTCATTGCTCTCGCTGAA<br>GGAATAGCTGTAGGAAGAAGCTTTTCAATGTTCAAGAACTACCATATTGACGG<br>GAACAAAGAGATGATTGCTTTCGGAACGATGAACATTGTCGGTTCTTGACCT<br>CTTGCTACCTCACACAGGGCCATTTTCAGATCAGCAGTAAATTACAACGCA<br>GGATGCAAGACAGCAGTATCAACATTGTGATGGCAGTCGCTGTCATGTTAC<br>GTTGTTATTCCTGACACCTTTGTTCCATTACACTCCTCTTGTTGGTGTTGGCAGCC<br>ATAATTATATCCGCAATGCTTGGTCTCATTGATTATGAAGCAGCCATGCATCTCT<br>GGCATGTTGACAAATTTGACTTTATAGTCTGCATGAGTGCATACCTTGGTGTGG<br>TTTTGGCAGCGTAACAATTGGCCTAGTCATAGCGATTTTCGATATCTTTGCTTAG<br>GGTACTCCTGTTTCGTTGCCAGACCAAGGACCTTGGTTATGGGAAACATTCCAG<br>AGTCTATGATTTACAGAAACGTTGAACAATACCCAAATGCAAACAATGTACCT<br>GGAATTCTCATACTTGAAATCGATGCTCCCATTTACTTCACCAATGCAAGCTAC<br>TTAAGAGAACGAATTGCAAGGTGGATTGATGAAGAGGAAGACAGAATAAAA<br>TCATCTGGGGAAACTGGCCTACAGTACGTAATACTGGATATGAGTGTGTTGG<br>TAACATTGATACGAGCGGAATTAGCATGCTTGAAGAGATGAAGAAGACTACT<br>GAAAGAAGAGGGCTCAAGCTTGATTGGCCAACCCTGGAGGCGAGGTGATG<br>AAGAAGCTGAATAAGTCCAAGTTTATCGAAAACATAGGCCAAGAATGGATT<br>ACTTGACAGTTGGAGAGGCCGTTGGAGCATGCAACTACATGCTTCACACATG<br>CAAGTCCAACCCAGCTAAGAAAGATGATCAAGCAGAGACATGGAACAACGT<br>ATGA |
| JrSULTR3.2a | >ATGGGTAACGCAGACTATGAATGCCACACCCTGTTGCTATTCTCCATCCAA<br>AACTCTATTCAAGTCCTTAGAATCGTCTCTCAAAGAGACTTTCTTTCCTGATGA<br>CCCCTTCCGGCCTTTCAAGAACCAGCCTCTTACTAAGAAGGTTGTCCTTGGCC<br>TTCAATACTTTGTACCAATCCTGGAATGGGCTCCTCGCTACACTTTTGAGTTCTT<br>CAAATCCGATCTTATTGCCGGAATCACTATTGCCAGTTTAGCAGTCCCTCAAGG                                                                                                                                                                                                                                                                                                                                                                                                                                                                                                                                                                                                                                                                                                                                                                                                                                                                                                                                                                                                                                                                                                                                                                                                                                                                                                                                                                                                                                                                                                                                                                                                                                                                                                                                                                                                                                                                                                |

|             |                                                                                                                                                                                                                                                                                                                                                                                                                                                                                                                                                                                                                                                                                                                                                                                                                                                                                                                                                                                                                                                                                                                                                                                                                                                                                                                                                                                                                                                                                                                                                                                                                                                                                                                                                                                                                                                                                                                                              |
|-------------|----------------------------------------------------------------------------------------------------------------------------------------------------------------------------------------------------------------------------------------------------------------------------------------------------------------------------------------------------------------------------------------------------------------------------------------------------------------------------------------------------------------------------------------------------------------------------------------------------------------------------------------------------------------------------------------------------------------------------------------------------------------------------------------------------------------------------------------------------------------------------------------------------------------------------------------------------------------------------------------------------------------------------------------------------------------------------------------------------------------------------------------------------------------------------------------------------------------------------------------------------------------------------------------------------------------------------------------------------------------------------------------------------------------------------------------------------------------------------------------------------------------------------------------------------------------------------------------------------------------------------------------------------------------------------------------------------------------------------------------------------------------------------------------------------------------------------------------------------------------------------------------------------------------------------------------------|
|             | <p> GATAAGCTATGCAAGTTTGGCTAACTTACCACCAATTCTCGGATTATATTCCAG<br/> CTTTGTCCCACCATTTGGTGTATGCCATGTTGGGGAGCTCTAGAGATCTGGCGGT<br/> GGGCACTGTGGCTGTGGCATCCCTTCTCATATCTTCTTTGCTGGGGAAGGAAG<br/> TTAACCTAATGAGAACCCAAAACCTTTATCTTCAACTGGCTTTCACGGCTACGT<br/> TCTTTGCTGGACTCTTTCAAGCTTCTCTGGGCTTCTTAAGACTTGGTTTTATCGT<br/> GGACTTTCTGTCTCATGCGACGATAGTGGGGTTCATGGGTGGAGCAGCCACGG<br/> TTGTCTGTCTTCAGCAACTTAAAGGGCTACTCGGGCTGGTTAATTTCACTCATC<br/> AGACTGATATTTCTCAGTCATGCGCTCTGTATTTTCCCAAACACACCAGTGGA<br/> GATGGGAAAGTGGTGTTTTGGGGTGTCTGTTTCTCTTCTTCTCCTCCTCACA<br/> AATACTTTAGCAAGAAAAGGGCGGCCTTCTTTTGGATAAATGCGATGGCACCT<br/> CTGACGTCTGTTATCTTGGGAAGCCTCCTCGTTTATCTGACCCACGCTGAAAA<br/> ACACGGTGTGAAGTGATTGGGCACCTGAAGAAAGGCTTAAATCCACCTTCG<br/> GTATCTGATTTGGCTTTTGGGTCTCCATATCTGATGACAGCCATCAAACTGGA<br/> ATCATCACTGGCGTCATAGGCCTTGCAGAAGGAGTAGCAGTGGGGAGAAGCT<br/> TTGCCATATTCAAGAACTACCACATCGACGGGAACAAAGAGATGATCGCTTTT<br/> GGGATGATGAATATTGCTGGCTCTTGCACTTCATGCTACTTGACCGCAGGACC<br/> ATTTTCTCGAAGTGCGGTGAATTTCAATGCAGGATGTAAGACGGCAGTGTCTGA<br/> ACATAGTCATGGCAACAGCCGTGATGATCACGTTGTTATTCCTAACACCTTTT<br/> TCTTCTATACACCCCTTGTGGTGCTCTCTCCATAATCATGGCAGCCATGCTTGG<br/> CCTTATTGACTATGAAGCTGCCATCCATCTCTGGAAGATCGACAAATTCGATT<br/> CCTGGTGTGCATGGGTGCTTATCTTGGTGTGGTCTTTGGCAGTGTGAGATTGG<br/> CTTAGTCATCGCGTTACGCTATCTTTGTTAAGGGTTTTACTATTT<br/> GTAGCAAGGCCACGGACTTTTATCTTGGGCAATATTCCCAACTCCAATGTGTT<br/> AGAAGCGTTGATCAATACCCAACTGCCAACAATGTTCCCGGAGTTCTCATTCT<br/> CCAAATTGATGCACCCATTTACTTTGCCAATGCAAACCTACTTGAGAGAAAGGA<br/> TTTCAAGGTGGATCTACGAGGAGGAAGAAAAATTAAAGCTTCGGGAGAAAA<br/> CCAGCTTGCAGTATATTATATTAGACATCAGTACTGTGGGCAGTATTGATACGA<br/> GTGGGATTAGCATGCTTGAAGAGGTTAAGAAGAATGCCGATAGAAAGGGTCT<br/> CAAGCTCGTGCTAGCCAACCCAAGAAGCGAGGTGATCAAGAAGCTAGACAA<br/> GTCCAAATTCATCGAAAACATCGGCCAAGAATGGATTTATCTAACAGTAGGA<br/> GAGGCCGTGGCAGCTTGCAACTTCATGTTACACTCGTGCAAGCCAAACCCGG<br/> CCGCCGCCGAATTAAATGCGCCAGAAAACAATGTCTGA </p> |
| JrSULTR3.2b | <p> &gt;ATGGGTAACGGCGACTATCAATGCCCGCACCTGTTGCAATTCCTCCATCCA<br/> AACCGCTATCCAAGTCCTTACAATCGTCTATTAAAGAGACTTTCTTTCCCGATG<br/> ATCCCTTCCGGCAGTTCAAGAACCAGCCTCTATCTAGGAAGCTTGTAATTGGC<br/> CTGCAATACTTGATACCAATCCTCGAATGGGCTCCTAGATACACGTTTGACTTC<br/> TTCAAATCCGATGTTATTGCTGGAATCACTATTGCCAGTCTAGCGGTGCCTCAA<br/> GGCATAAGCTATGCAAGTTTGGCCAACTTACCACCGATTCTCGGGTTATATTCC<br/> AGCTTTGTCCCGCCATTGGTGTATGCCATGTTGGGGAGCTCAAGAGATTGGC<br/> CGTGGGCACTGTGGCTGTTGGGTCCCTTCTCATATCTTCCATGCTGGTGAAGGA<br/> AGTTAACCTCATGATAACCCAAAACCTTTATATTCAACTGGCTCTCACTGCT<br/> ACGTTCTTTGCTGGAGTCTTTCAAGCTTCTCTCGGATTCTTAAGACTTGGATTTA<br/> TCGTGGACTTCCTGTCACATTCAACGATAGTGGGGTTCATGAGTGGAGCAGCC<br/> ACGGTTGTTGTCTTCAGCAACTTAAAGGGATTCTTGGGCTGATTCACTTCACT </p>                                                                                                                                                                                                                                                                                                                                                                                                                                                                                                                                                                                                                                                                                                                                                                                                                                                                                                                                                                                                                                                                                                                                                                                               |



|            |                                                                                                                                                                                                                                                                                                                                                                                                                                                                                                                                                                                                                                                                                                                                                                                                                                                                                                                                                                                                                                                                                                                                                                                                                                                                                                                                                                                                                                                                                                                  |
|------------|------------------------------------------------------------------------------------------------------------------------------------------------------------------------------------------------------------------------------------------------------------------------------------------------------------------------------------------------------------------------------------------------------------------------------------------------------------------------------------------------------------------------------------------------------------------------------------------------------------------------------------------------------------------------------------------------------------------------------------------------------------------------------------------------------------------------------------------------------------------------------------------------------------------------------------------------------------------------------------------------------------------------------------------------------------------------------------------------------------------------------------------------------------------------------------------------------------------------------------------------------------------------------------------------------------------------------------------------------------------------------------------------------------------------------------------------------------------------------------------------------------------|
|            | <p> CATGAAACTGATCTTGTATCGGTCATTGCTCTGTATTTTCCCAAACACACCAG<br/> TGGAGATGGGAAAGTGGTGTACTGGGTTGCTGTTTTCTTTCTACCTTCTGCTC<br/> ACAAGATACTTTAGCAAGAAAAGGCCAGTCTTCTTTTGGATAAATGCAATGGC<br/> ACCTCTGACGTCTGTCATCTTCGGAAGCATCCTCGTCTTTCTGACCCACGCTGA<br/> AAAGCACGGTATACAAGTGATTGGGCATCTGAAGAAAGGCTTGAATCCACTT<br/> TCCGTATCTGAGTTGGCTTTTGGGTCGCCTTATCTATCGACAGCCATCAAACT<br/> GGGATCATCACTGGCGTCATAGGCCTTGCTGAAGGAGTAGCAGTTGGTAGAA<br/> GCTTCGCCATTTTCAAGAACTACCATATCGATGGAAACAAAGAGATGATCGCT<br/> TTTGGGATGATGAATATTGCTGGCTCTTGCACTTCATGTTACTTGACAGCAGGA<br/> CCATTTTCGAGAACTGCAGTGAATTTCAATGCAGGATGCAAGACAGCAGTGT<br/> CGAACATAGTCATGGCAACAGCAGTGATGATCACGTTGCTATTCTGACACCG<br/> TTGTTTTACTATACACCTCTTGTTGTTCTCTCCTCCATAATCATCGCTGCCATGCT<br/> TGGCCTTATTGACTATCAAGCTGCCATCCACCTCTGGAACATCGACAAATTTG<br/> ATTTACGGTGTGCATGGGAGCTTATCTTGGCGTGGTCTTTGGCAGTGTTGAGA<br/> TTGGCTTAGTCATCGCGGTTACCCTATCTTTGCTAAGGGTTCTACTATTTGTAGC<br/> AAGGCCACGGACTTCTGTCTTGGGCAATATCCCAAGTACTCCATGGTTTACA<br/> GAAGTACTGATCAATACCCAATCGCTAACAATGTTCTGAGTTCTCATTCTCC<br/> AAATTGACGTGCCAGTATACTTTGCCAATGCAAATTACTTGAGAGAAAGGATA<br/> TCAAGGCGGATCTTCGAAGAGGAAGACAGAATAAAATCTTCGAGCGAAATTA<br/> CCAGCTTACATTATGTTATATTGGACCTTGGCGCTGTGGGCAGCATTGATACGA<br/> GTGGGATCAGCATGCTTGAAGAGATCAAGAGGATTGCCGATAGAAAGGGCCT<br/> CGAGCTCTTGCTTGCCAACCCAAGAAGCGAGGTGATTAAGAAGCTAGACAAG<br/> TCCAAATTCATCGAAAACATTGGTCAAGAACGGATTATCTTACAGTAAGAGA<br/> GGCTGTGGCGGCATGTAATTTTCATGTTACATACATGCAAGCCAAATCAGGCC<br/> GATGCCCAGACTATTCCGGAGAACAATGTCTAA </p> |
| JrSULTR3.3 | <p> &gt;ATGGAGCCCAATATTAACGCCGGTAGCATGGACTCCCACTGCTTGGAATAA<br/> GGATGGAACCACACAAAGTCGTCCCACCGCCCCCTAGGAGCACCTTACAAAA<br/> GCTCAAGAGCAGGCTCAAGGAAACCTTCTTCCCCGATGACCCTTTGCGCCAA<br/> TTCAAAGGACAACCATTGAAGACCAAATTCATTCTTGGAGCACAGTATATCTT<br/> TCCTATCCTTAACCTGGGGTCCTAATTACAGCCTCAAACCTTTAAGTCCGACAT<br/> TGTTTTCTGGTCTCACTATTGCAAGCTTAGCGATTCTCAGGGTATCAGTTATGCT<br/> AACCTTGCCAATCTACCTCCTATTGTGGGTCTCTATTCCAGCTTTGTTCTCCAC<br/> TTGTGTATGCTGTTCTTGGAAGTTCTAGGGACCTGGCTGTAGGACCTGTTTCTA<br/> TTGCTTCTCTTGTACTGGGATCCATGCTTATGCAAGAAGTCTCTCCCAACAACG<br/> ATCCCGTCTTGTTTCTTCAGCTGGCCTTTACTTCAACCTTCTTTGCTGGTCTCTT<br/> CCAAGCTTCTTTAGGATTCTTAAGGCTTGGATTIATTATTGACTTTCTCTCGAAA<br/> GCTACTCTGATTGGGTTTCATGGCTGGAGCTGCTATTATAGTCTCTCTGCAACAG<br/> CTCAAAGGCCTCCTTGGAATCACCCATTTTACCAAACAAATGGGTTTGTTCC<br/> TGTTTTAAGCTCTGTTTTCCACAACATAAAAGAGATTGGAAAACCTACAAGAAG<br/> GATTGAACCCACCTTCATGGCATATGTTGCATTTTCATGGTATCCACCTAGGAC<br/> TGGTAATGAAGACAGGGCTGGTCACTGGCATCCTATCCCTCACAGAAGGCATT<br/> GCTGTGGGAAGGACTTTTGCTGCTCTAAAGGACTACCGAGTA<br/> GATGGAAACAAGGAAATGATAGCTATTGGGTTAATGAATATGGTTGGCTCCTC<br/> CACTTCTTGCTACGTTACTACAGGTGCTTTCTCGAGGTCAGCTGTCAATCACAA </p>                                                                                                                                                                                                                                                                                                                                          |

|             |                                                                                                                                                                                                                                                                                                                                                                                                                                                                                                                                                                                                                                                                                                                                                                                                                                                                                                                                                                                                                                                                                                                                                                                                                                                                                                                                                                                                                                                                                                                      |
|-------------|----------------------------------------------------------------------------------------------------------------------------------------------------------------------------------------------------------------------------------------------------------------------------------------------------------------------------------------------------------------------------------------------------------------------------------------------------------------------------------------------------------------------------------------------------------------------------------------------------------------------------------------------------------------------------------------------------------------------------------------------------------------------------------------------------------------------------------------------------------------------------------------------------------------------------------------------------------------------------------------------------------------------------------------------------------------------------------------------------------------------------------------------------------------------------------------------------------------------------------------------------------------------------------------------------------------------------------------------------------------------------------------------------------------------------------------------------------------------------------------------------------------------|
|             | <p> TGCAGGAGCAAAAACAGCAGCTTCTAACATAGTAATGTCTGTGACAGTCATG<br/> GTGACACTCCTCTTCCTCATGCCTCTCTTCCAATACACACCTAATGTTGTATTGG<br/> GTGCAATCATAGTCTCGGCAGTGGTTGGCCTCATCGATATCCCGTCTGCATATC<br/> ACATTTGGAAGATCGATAAGTTCGATTTTCTCGTCACTTTATGTGCATTCTTGCG<br/> TGTTATATTCATCTCAGTCCAAGAAGGCCTCGCCATTGCGGTTGGAATATCTGT<br/> TTTCAAGATCCTCCTGCAAATTACAAGGCCAAAAACATTGATGTTGGGGAAA<br/> ATACCTGGGACGGATATATACCGAAATCTTCATCATTACAGGGAAGCTACG<br/> ACAGTCCCTGGTTTCCTCATTCTAAGCGTTGAATCTCCCATCAATTTTGCTAAC<br/> ATCACGTACCTTAATGAAAGGATTTTGAGATGGATAGAAGAATATGAAGCGGA<br/> AGAAGATATTA AAAACAATCAACCTTCCAATATGTGATTTTGGATTGTG CAGC<br/> TGTGAGTTCCATAGACACAAGTGAATCGTTCTATTCAAGGATTTGAGGAAAG<br/> CAATGGAAAAGAAAGGTGTTGAGCTTATCTTGGTGAATCCTCTGGGGGAGGTT<br/> ATGGACAAACTGCAGAAGGCAGACGAAGCTCGGGATCTCATGAGACCGGAT<br/> AACCTTTACTTGACAATTGGAGAAGCTGTATCTTCACTTTTATTAACAATATTG<br/> AAGGTCCCTCTGGGCGTCAGCATGCCATCCTGGAGATGTCTGCACTCCGAGG<br/> AGACCCGGGAGAGCTCCTCCTTGACCCAGCCAGCTCCCGCTTCAACGTGGT<br/> CTTCTTCCCTTCAACTTTTGCCCTTCTCTCTCAGAAGCCTATGGTGCTCCTTC<br/> AAGGTCGTCTTCTATCAGCCCGTCATGCTCCAAGGAGAGGACCTCAACCTCCT<br/> GATTTGCCTTGCGAATCTCCAGGCGGGTAA </p>                                                                                                                                                                                                                                                                                                                                                                        |
| JrSULTR3.4a | <p> &gt;ATGGGTGTCAACTCTAACAGAGTGGAACACCTTTCATGTCCAGAAACCACTC<br/> TGAGAATACATACAGAGTTGGTGGCAATGCCACCCTTGCAAATCCACAACGTT<br/> TGCTTGCCACCAGAGCAAACCACATTCCAGAAACTCAAGCACAGGCTCGCCG<br/> AGATTTTCTTCCCGACGACCCACTTTACAGATTCAAGAATCAAACATGGTTC<br/> AGGAAATTCATCCTGGCTCTTCAGTTTTTCTTCCCTGTGTTTCAGTGGGGGTCT<br/> GAGTACAATGTTAGTCTTCTGAGGTCCGATGTCATATCTGGTCTGACAATTGCT<br/> AGCCTGGCTATCCCGCAGGGAATCAGTTATGCAAAGCTTGCCAATTTGCCACC<br/> TATAGTCGGGCTATATTCAAGCTTGTTCCTCCCACTGATATACGCTATC<br/> CTTGGAAGTTCCAGACATCTTGGCGTTGGCCCTGTCTCAATAGCATCTTTGGTC<br/> ATGGGATCAATGCTAAGTGAAGAAATCTCTCCTAATGAAGATCCAATTACTTA<br/> CCTTCAATTGGCCTTCACTGCCACCTTCTTTGCTGGTGTATTTACAGGCATCTCTA<br/> GGTCTATTAAGGTTAGGTTTTATAATTGATTTTCTCTCAAAGGCAACTCTGGTTG<br/> GGTTTATGGCTGGTGCAGCAGTCATTGTGTCATTGCAACAGCTGAAAGCATTG<br/> CTCGGAATTGTCCATTTCACTAGCAAAATGGAAATTGTTCTGT CATATCCTCT<br/> GTTTTGAAGCAGACAGATGAGTGGTCTTGCAAACCATTGTAATGGGTTCTGG<br/> TTTCTCCTCTTTCTGTTGACAACAAGGCATATCAGCATTAGGAAACCAAAGC<br/> TTTTTTGGGTCTCAGCAGCAGCTCCATTGACTTCGGTTGTTCTCTCGACCCTAC<br/> TAGTTTTCTCCTCAAGTCCAAGACTCAGGAAATTCCAATTATTGGCCGCTTGC<br/> CAAAGGGCCTTAATCCTCCTTACTAAACATGCTATGCTTTAGTGGCCCCCATC<br/> TAGCCGTTGCTATCAAACTGGCATCATAACTGGGATCTTATCTCTCACTGAAG<br/> GAATCGCTGTGGGGAGGACGTTTGCTGCCCTGAAAAATTACCAAGTAGATGG<br/> AAACAAAGAAATGATGGCTATTGGCCTTATGAACATGGCTGGTTCATGCTCCT<br/> CATGTTATGTTACTACAGGATCGTTTTCT<br/> CGATCTGCTGTAAACTATAACGCTGGAGCTCAAACAGCAGTGTGGAATATAGT<br/> CATGGCTTCAGCTGTGCTTGTGACTCTGCTGTTTCTCATGCCACTATTTTATTAC </p> |

|             |                                                                                                                                                                                                                                                                                                                                                                                                                                                                                                                                                                                                                                                                                                                                                                                                                                                                                                                                                                                                                                                                                                                                                                                                                                                                                                                                                                                                                                                                                                                                                                                                                                                                                                                                                                                                                                                                                                                                                                                                                                                                                                                                                                                                                                                                                                         |
|-------------|---------------------------------------------------------------------------------------------------------------------------------------------------------------------------------------------------------------------------------------------------------------------------------------------------------------------------------------------------------------------------------------------------------------------------------------------------------------------------------------------------------------------------------------------------------------------------------------------------------------------------------------------------------------------------------------------------------------------------------------------------------------------------------------------------------------------------------------------------------------------------------------------------------------------------------------------------------------------------------------------------------------------------------------------------------------------------------------------------------------------------------------------------------------------------------------------------------------------------------------------------------------------------------------------------------------------------------------------------------------------------------------------------------------------------------------------------------------------------------------------------------------------------------------------------------------------------------------------------------------------------------------------------------------------------------------------------------------------------------------------------------------------------------------------------------------------------------------------------------------------------------------------------------------------------------------------------------------------------------------------------------------------------------------------------------------------------------------------------------------------------------------------------------------------------------------------------------------------------------------------------------------------------------------------------------|
|             | <p>             ACTCCCACTGTCATCTTGGCGGCCATCATCATAACAGCTGTGATTGGGCTGATC<br/>             GATTATCAGGCTGCATACAAGTTGTGGAAAGTCGACAACTTGATTTTCGTGGC<br/>             TTGTTTGTGCTCCTTTCTTGGTGTCTTTTCATTCAGTGCCAACAGGTCTTGCC<br/>             ATTGCGGTGGAGTTTCGGTTTTCAAGATTCTCTTGCATGTCACCAGGCCAAAC<br/>             ACCATGGTTTTAGGGAATATCCGTGGTACTCAAATATACCAAATCTCATCCGG<br/>             TACAGAGATGCTTCAAGGGTTCCTCGTTTCTCATTCTAGCTGTTGAGTCTCCC<br/>             ATCTACTTCGAACTCCACCTACCTGCAAGAAAGGATACTAAGATGGGTTCG<br/>             AGAGGAGGAAGACTGGATAAAAGCAAATAATGGGAGTACATTGAAATGCTTA<br/>             ATTCTAGACATGACAGCTGTGACAGCCATAGATACAAGTGGTATCGACACAAT<br/>             ATGTGAAATCAGAAAGATGCTGGAGAAAAGATCACTTCAGCTTGTGTTGGCA<br/>             AATCCTGTTGGATCTGTGACGGAAGCTAGATCATTAGGAATCTTGAGTC<br/>             CTTCAAGTTGAATGGACTCTATCTCTCTGTTGGAGAAGCTGTGGTCCATATATC<br/>             GTCTTTGTGGAAGGCTCAGCCATGA           </p>                                                                                                                                                                                                                                                                                                                                                                                                                                                                                                                                                                                                                                                                                                                                                                                                                                                                                                                                                                                                                                                                                                                                                                                                                                                                                                                                                                  |
| JrSULTR3.4b | <p>             &gt;ATGGGTGTCAATTCTAACAGAGTGGAACACCTTGCATGTCCAGAAACCACTC<br/>             TGAGAATGCATGCAGAGTTGGTGGTAATGCCACCCTTGCAAATCCACAACGTT<br/>             TGCTTGCCACCAGAGCAAACCACTTTCCGGAAACTCAAGCACAGTCTTGCCG<br/>             AGATTTTCTTCCCCGACGACCCACTTTACAGATTCAAGAATCAAACATGGTTC<br/>             AGGAAATTCATCCTGGCTCTTCAGTTTTTCTTCCCTGTGTTTCAGTGGGGTCT<br/>             GAGTACAATATTAGTCTTCTGAGGTCCGATGTCATATCTGGTCTGACAATTGCT<br/>             AGCCTGGCTATCCCGCAGGGAATCAGTTATGCAAAGCTTGCCAATTTGCCACC<br/>             TATAGTCGGGTATATTCAAGCTTTGTGCCCCCTCTGATATACGCCATCCTTGGA<br/>             AGTTCCAGACATCTTGGCGTTGGCCCTGTCTCAATAGCATCTTTGGTCATGGGA<br/>             TCAATGCTAAGCGAAGAAATCTCTCCTAATGAAGATCCAATTACTTACCTTCA<br/>             ATTGGCCTTCACTGCCACCTTCTTTGCTGGTGTATTCAGGCATCTCTAGGTCTA<br/>             TTAAGGTTAGGTTTTATAATTGATTTTCTCTCAAAGGCAACTCTGGTTGGGTTTA<br/>             TGGCTGGTGCAGCAGTCATTGTGTCATTGCAACAGCTGAAAGGATTGCTCAGA<br/>             ATTGTCATTTCACTAGCAAGATGGGGATTGTTCTGTCTATATCCTCTATTTTGA<br/>             AGCAGACAGATGAGTTTTCTTGCCAAACCATTGTAATGGGTCTGGTTTCCTC<br/>             GTCTTTCTGTTGACAACAAGGCATATCAGCATTAGGAAACCAAAGCTTTTTTG<br/>             GGTCTCAGCAGCAGCACCATTAACTTCGGTTGTTCTCTCGACCCTACTAGTTTT<br/>             CCTCTCAAGTCCAAGACTCAGGAAATTCCAATTATTGGCCGCTTGCCA<br/>             AAGGGCCTTAATCCTCCTTCACTAAACATGCTATACTTTAGTGGCCCCCATCTA<br/>             GCCGTTGCTATCAAACTGGCATCATAACTGGGATCTTATCTCTCACTGAAGG<br/>             AATCGCTGTGGGAGGACGTTTGCTGCTCTGAAAAATTACCAAGTAGATGGA<br/>             AACAAAGAAATGATGGCTATTGGCCTTATGAACATGGCTGGTTCATGCTCCTC<br/>             ATGTTATGTTACTACAGGATCGTTTTCTCGATCTGCTGTAAACTATAACGCTGG<br/>             AGCTCAAACAGCAGTGTGCAATATAGTCATGGCTTCAGCTGTGCTTGTGACTC<br/>             TGCTGTTTCTCATGCCACTATTTATTACACTCCCACTGTCATCTTGGCGGCCAT<br/>             CATCATAACAGCTGTGATTGGGCTGATCGATTATCAGGCTGCATACAAGTTGTG<br/>             GAAAGTCGACAACTTGATTTCGTGGCTTGTTTGTGCTCCTTTCTTGGTGT<br/>             CTTTTCATTCAGTGCCAACAGGTCTTGCCATTGCGGTTGGAGTTTCGGTTTTG<br/>             AAGATTCTCTTGCATGTCACCAGGCCAAAAACCATGGTTTTAGGGAATATCCG<br/>             TGGTACTCAAATATACCAAATCTCATCCGGTACAGAGATGCTTCAAGGGTCC<br/>             CCTCGTTTCTCATTCTAGCTGTTGAGTCTCCCATCTACTTCGAAACTCGACCT           </p> |

|             |                                                                                                                                                                                                                                                                                                                                                                                                                                                                                                                                                                                                                                                                                                                                                                                                                                                                                                                                                                                                                                                                                                                                                                                                                                                                                                                                                                                                                                                                                                                                                                                                                                                                                                                                                                                                                                                                                                                                                                                                                                                                                                                                                                                              |
|-------------|----------------------------------------------------------------------------------------------------------------------------------------------------------------------------------------------------------------------------------------------------------------------------------------------------------------------------------------------------------------------------------------------------------------------------------------------------------------------------------------------------------------------------------------------------------------------------------------------------------------------------------------------------------------------------------------------------------------------------------------------------------------------------------------------------------------------------------------------------------------------------------------------------------------------------------------------------------------------------------------------------------------------------------------------------------------------------------------------------------------------------------------------------------------------------------------------------------------------------------------------------------------------------------------------------------------------------------------------------------------------------------------------------------------------------------------------------------------------------------------------------------------------------------------------------------------------------------------------------------------------------------------------------------------------------------------------------------------------------------------------------------------------------------------------------------------------------------------------------------------------------------------------------------------------------------------------------------------------------------------------------------------------------------------------------------------------------------------------------------------------------------------------------------------------------------------------|
|             | ACCTCCAAGAAAGACATGACAGGTA CTT CAGTTATCCAAACTTGACTGTGAC<br>AGCCATAGATACAAGTGGTATCGACACAATATGTGAAATCAGAAAGATGCTG<br>GAGAAAAGATCACTTCAGCTTGTGTTGGCAAATCCTGTTGGATCTGTGACGGA<br>AAAGCTAGATCATT CAGGAATCTTGCAGTCCTTCAAGTTGAATGGACTCTATCT<br>CTCTGTTGGAGAAGCTGTGGTCCATATATCGTCTTTGTGGAAGGCTCAGCCATG<br>A                                                                                                                                                                                                                                                                                                                                                                                                                                                                                                                                                                                                                                                                                                                                                                                                                                                                                                                                                                                                                                                                                                                                                                                                                                                                                                                                                                                                                                                                                                                                                                                                                                                                                                                                                                                                                                                                                            |
| JrSULTR3.4c | >ATGGGTGTCAACTCTAATAGAGTGGAACACTTTGCATGTCCAGAAACCAATC<br>TGATAATTCCGGCAGAGTTGGTAGCAATGCCACCGTTGCAAATCCACAAAGTT<br>TGCTTGCCACCAGAGCAAAGCACTTTCCAGAACTAAAGCACAGGGTCTCCG<br>AGATCTTTTTCCCTGATGACCCACTTTACAGATTCAAGAACCAGACATGGTTC<br>ATGAAGTTGATTCTGGCTCTTCAGTTTCTGTTCCCTGTATTCCAGTGGGGGTCT<br>GAGTACAATGTTAGTCTTCTGAGGTCCGATGTCATATCTGGTCTGACAATTGCT<br>AGCCTGGCCATCCCACAGGGAATCAGTTATGCAAAGCTTGCCAATTTGCCACC<br>AATAGTGGGGCTATATTCAAGCTTTGTGCCCCATTGATATATGCCATACTTGG<br>AAGTTCTAGACATCTTGGAGTTGGTCCTGTCTCAATAGCATCTTTGGTAATGGG<br>ATCAATGCTGAGCGAGGTAGTCTCTCCTGGAGAAGAGCCAATTCTCTATCTTC<br>AATTGGCCTTTACTGCCACCTTCTTTGCTGGTTTATTT CAGACTTCTCTTGGTCT<br>TTAAGGTTAGGATTTATAATTGATTTTCTCTCAAAGGCAACACTAGTTGGGTTT<br>ATGGCTGGTGCAGCAGTCATTGTGTCATTGCAACAGCTGAAAGGATTGCTCGG<br>AATTGTCCACTTTACTAGCAAAATGCAAATTATTCAGTCATATCCTCTGTTTTG<br>AACCAGAAAGATGAGTGGTCGTGGCAAACCATTGTCATGGGTTTTGGTTTCCT<br>CCTTTTTCTGTTGACTACAAGGCATATTAGCATTAGGAAACCAAAGCTATTTG<br>GGTCTCAGCAGCAGCCCCATTAACGTCGGTTATTCTTTCAACCCTGCTAGTTTT<br>CCTCCTCAAGTCTAAGGCACACGGAATTCCAGTCATTGGCCACTTGCCA<br>AAAGGCGTTAATCCTCCTTCACTAAACATGCTATACTTCAGTGGCCCCCATCTT<br>GCTGTTGCTATTAAAACTGGCATTGTGACTGGGATCTTATCTCTCACTGAAGGA<br>ATTGCCGTGGGGAGGACATTTGCTGCTCTGAAAACTACCAAGTGGACGGAA<br>ACAAAGAAATGATGGCTATTGGTATCATGAACATTGCTGGTTTCATGCTCTTCAT<br>GCTATGTTACTACAGGATCATTTTCTCGATCTGCTGTAACTATAACGCTGGAG<br>CACAAACAGCAGTGTCCAATATAGTCATGGCTTCAGCTGTGGTTGTGACTCTA<br>ATGTTTCTCATGCCACTGTTTTATTACACTCCAAATGTCATCTTAGCGGCCATCA<br>TCATAACAGCCGTGATTGGACTAATCGATTATCAAGCAGCATACAAATTGTGG<br>AAAGTTGACAAACTTGATTT CATGGCCTGTTTGTGTGCCTTTCTCGGTGTTCTTT<br>TTGTTTCAGTGCCACTAGGTCTTGCCATCGCGTTGGAGTCTCTGTTTTCAAGA<br>TTCTCTTGCATGTCACCAGGCCAAACACCATGATTTTAGGGAATATCATGGGTA<br>CTCAAGTATACCAAAACCTCATCCGTACAGAGAAGCTTCAAGGGTCCCTTCC<br>TTTCTCATTCTTGCTGTTGAATCTCCCATCTACTTTGCAAACCTCAACTTACCTGC<br>AAGAAAGGATATTAAGATGGATTGCGGAGGAGGAAGAATGGATAAAAGCAA<br>ATAATGGGAGTCCATTGAAATGTGTAATTTTAGACATGACAGCTGTGACAGCC<br>ATAGACACAAGTGGTATTGACACAATCTGTGAAATCAGAAAGATGCTGGAGC<br>AAAAATCACTCAAGCTTGTGTTGGCAAATCCGGTTGGATCAGTGACGGAAAA<br>GCTTGATAAGTCGGAAATCTTGGAGACCTTCAGGTTGAATGGACTCTATCTCTC<br>TGTTGGAGAAGCTGTGGCCTATATATCGTCCTTGTGGAAGGCTTAG |
| JrSULTR3.5a | >ATGGGCACTCGTAACGAACCTGAACACCCGGTAAGCTTTGCTCCCCCTAGAG                                                                                                                                                                                                                                                                                                                                                                                                                                                                                                                                                                                                                                                                                                                                                                                                                                                                                                                                                                                                                                                                                                                                                                                                                                                                                                                                                                                                                                                                                                                                                                                                                                                                                                                                                                                                                                                                                                                                                                                                                                                                                                                                        |

|             |                                                                                                                                                                                                                                                                                                                                                                                                                                                                                                                                                                                                                                                                                                                                                                                                                                                                                                                                                                                                                                                                                                                                                                                                                                                                                                                                                                                                                                                                                                                                                                                                                                                                                                                                                                                                                                                                                                                                                                                                                                                                                                                                                                                                                                             |
|-------------|---------------------------------------------------------------------------------------------------------------------------------------------------------------------------------------------------------------------------------------------------------------------------------------------------------------------------------------------------------------------------------------------------------------------------------------------------------------------------------------------------------------------------------------------------------------------------------------------------------------------------------------------------------------------------------------------------------------------------------------------------------------------------------------------------------------------------------------------------------------------------------------------------------------------------------------------------------------------------------------------------------------------------------------------------------------------------------------------------------------------------------------------------------------------------------------------------------------------------------------------------------------------------------------------------------------------------------------------------------------------------------------------------------------------------------------------------------------------------------------------------------------------------------------------------------------------------------------------------------------------------------------------------------------------------------------------------------------------------------------------------------------------------------------------------------------------------------------------------------------------------------------------------------------------------------------------------------------------------------------------------------------------------------------------------------------------------------------------------------------------------------------------------------------------------------------------------------------------------------------------|
|             | <p> GCTTTTCCACCGTCTTGAAATCGGATCTGAAAGAACTTTCTTCCCCGACGAT<br/> CCGTTCCACCAATTCAAAAATGAAAAACCTCTCGCTGTGCCAAAAAAGCCA<br/> TACAATACTTCGTCCCCATCTTCGAATGGCTTCCCAAATATAATTTACGTTTACT<br/> CCGATATGATCTCCTGGCGGGCATCACCATTACTAGCCTTGCCATTCCCCCAAG<br/> GAATCAGCTACGCCAAACTCGCATTCCTTCCTCCCATCATTGGCCTCTGTACGT<br/> AAGACCTATAAATATATATATATATATATATTTATATATATATTTTTAACTGGTTCAAA<br/> TTCTAGCTTTGTTCCGCCTCTCATATACGCTGTTTTCGGGAACCTCGAAGCATATT<br/> GCAGTGGAACCGTAGCTGCATGCTCATTGCTCCTGCAGTCGACCCTTTTCAGA<br/> TGTGGTATCGCCAAAAGATGATCCGGCATTGTATATCCAGTTAATTTTTACTAC<br/> AACTTTCATCACTGGTATCTTTCAGACAGCTCTAGGTTTTCTGAGGTTGGGAAT<br/> TTTAGTGGATTTTTTATCGCATTGACGATAACTGGTTTTATGGGAGGGACGGC<br/> GATAATTATCTGCCTACAACAGTTAAAGGGATTTTTCGGAATGCATCATTTAC<br/> GACTAAAACAGACGTCATATCTGTAATGCATGCAATCTTCGAGAACAGAAAG<br/> GAGTGGAGGTGGCAGAGTGCAGTAGTCGGTGTGACTTTCCTTTGTTTCCTTCA<br/> AACAACTAGATACGTGAAAAAAAAGAACCCAAAGCTATTTTGGGTGTCCGCC<br/> ATAGCTCCAATGGTGACCGTTGTAGTTGGATGTTTGTTCGCTTATTTTCGCTCATG<br/> CGGAGTACCATGGTATTCAAATTGTGGGACATTTGAAGAAAGGAATAAATCCT<br/> CTTCAATCAATTTGCTAAACTTTAATTCTAAATATCTACCAACGTTAATAAAA<br/> GCGGGGATTACAACCTGGCCTTATAGCTATGGCCGAAGGAATAGCAATTGGAA<br/> GAAGCTTTGCCATTATGAACAATGAACAAGTTGATGGGAATAAGGAGATGATA<br/> GCTTTTGGCTTTATGAACATTGTTGGGTCTTTCACCTCATGCTACTTGACAACCTG<br/> GACCATTTTCGAAAACCTGCTGTAAATTTCAATGCCGGATGTAAGACTGCCATG<br/> TCAAACGTAGTGATGGCGATCGGCATGGGGCTGACGCTGCTGTTCTTGGCTCC<br/> TCTCTTTAGTTACACCCCTCTGGTTGCTTTATCTGCCATTATAATGTCTGCCATG<br/> CTTGGACTCATCAACTATGAAGAGGCTTATCACCTCTTCAAGGTCGACAAGTT<br/> CGATTTTATCATTTGCATGACTGCCTTCTTCGGTGTTCATTTCATAAGCATGGAT<br/> GTTGGCATCATTCTTTCGGTTGGACTTAGTCTAATTAGAGCACTCGTATACATG<br/> GCAAGGCCTGCCACTTGCAAGCTTGAAAAAGTTGCCAGCTCAAGTGTGTATC<br/> GTGACATTGAGCAGTATCCAGATTCAACGAACATCGAGGGCATCCTACTTCTA<br/> CAACTTGGTTCCCCATTTACTTTGCCAATTCCACCTACATCAGAGAAAGGATC<br/> TTGAGGTGGATTTCGAGAGGAACAGGCTGTTTCAAATTCTGAAGGAAGTAATCT<br/> TGAGAATGTTTATTAGATTTGACAGGGGTTACATCTATTGACATGACGGGCAT<br/> CGAAACGCTAACTGAAATACGTAAAACCTTGCAAGCATATGACATTAAGATG<br/> GCAATCATAAACCCAAGGATTAGGGTTATGGAGAAGATGATAGCCTCGAAATT<br/> CGTAGACACCATTGGGAAGGAGTATTTCTTCTGTCTATAGATGAGGCAATTGA<br/> AGCATCTCGGTTTTTGTTCGCGAGTCGAAACTGCAAATCAGATGTAACCTCT<br/> GA </p> |
| JrSULTR3.5b | <p> &gt;ATGGGTAGTGCTTCTATCGAGCCCCAACGCCTGGTCGTGAGCTTTGCTCCCC<br/> AAGAGACTTTGTCACCACTTTGAAATCAGATCTGAAAGAACTTTCTTCCCCG<br/> ACGATCCATTCCAGCAATTTAGAAATGAAAAACCATCTCGCCGTCTTAAAAAA<br/> GCCTTACAATACTTCATCCCAATCTTCGAATGGCTTCCAAAATACAACCTCCAT<br/> TTATTCCGATACGATCTTCTCGCCGGAATCACCATTACAAGCCTCGCAATCCCT<br/> CAGGGAATCAGCTATGCAAGACTTGATCCCTTCCTCCCATCATCGGCCTCTAT<br/> TCTAGCTTTGTTCCGCCGCTCATATACGCTGTTTTCGGGAACCTCGAAGCATCTT </p>                                                                                                                                                                                                                                                                                                                                                                                                                                                                                                                                                                                                                                                                                                                                                                                                                                                                                                                                                                                                                                                                                                                                                                                                                                                                                                                                                                                                                                                                                                                                                                                                                                                                                                                                                                                                      |

|            |                                                                                                                                                                                                                                                                                                                                                                                                                                                                                                                                                                                                                                                                                                                                                                                                                                                                                                                                                                                                                                                                                                                                                                                                                                                                                                                                                                                                                                                                                                                                                                                                                                                                                                                                                 |
|------------|-------------------------------------------------------------------------------------------------------------------------------------------------------------------------------------------------------------------------------------------------------------------------------------------------------------------------------------------------------------------------------------------------------------------------------------------------------------------------------------------------------------------------------------------------------------------------------------------------------------------------------------------------------------------------------------------------------------------------------------------------------------------------------------------------------------------------------------------------------------------------------------------------------------------------------------------------------------------------------------------------------------------------------------------------------------------------------------------------------------------------------------------------------------------------------------------------------------------------------------------------------------------------------------------------------------------------------------------------------------------------------------------------------------------------------------------------------------------------------------------------------------------------------------------------------------------------------------------------------------------------------------------------------------------------------------------------------------------------------------------------|
|            | <p>GCAGTGGGAACCGTGGCAGCATGCTCGTTGTTCCCTACAGTCAACCATTTCAGACG<br/> CGTAGTATCGCCAAACGATGATCCAGCATTGTATCTCCGTTTGATATTCACA<br/> TCAACGTTTCATCACTGGTATCTTTCAGACGGCTCTAGGTTTTCTAAGGTTGGGA<br/> ATTCTAGTGGATTTCTTATCGCATTCAACGATAACTGGTTTTATGGGTGGGACG<br/> GCGATAATCATCTGCCTGCAACAGTTAAAGGGGATTTTCGGATTGCTTCATTTT<br/> ACGACTAAAACGGATGTGATATCTGTAATTCATGCAATCTTCAAAACAGAAAA<br/> GAGAAAAAAGAAGCCAAAACCTATTCTGGGTTTCAGCTATAGCTCCAATGGTG<br/> ACGGTGGTAGTAGGCTGTTTGTTTGCTTATTTCACTCACGCAGACGACCATGGT<br/> ATCCAAATTGTTGGACATTTGAAGAAAGGAATAAATCCGCTTCAATTGGTTT<br/> ATTAACTTTGACTCTAAATATCTAGCAACAGTAATAAAAGCTGGGCTAGTAA<br/> CAGGCCTTATAGCTCTGGCTGAAGGGATAGCGATTGGAAGGAGCTTTGCCATT<br/> ATGCAAAATGAACAAGTTGATGGGAACAAGGAGATGATAGCGTTTGGCTTCA<br/> TGAACATTGTCGGGTCTTTCATTCTATGCTACTTGACAACTGGACCATTTTCCA<br/> AACTGCTGTCAATTTCAATTCCGGATGTAAGACGGCTATGTCAAACATAGTA<br/> ATGGCAGTGAGCATGGCGCTGACGCTCCTCTTCTTGGCTTCTCTGTTTAGTCAC<br/> ACTCCTCTGGTTGCTTTATCTGCCATTATCATGTCCGCCATGCTTGGCCTCATCA<br/> AATATGAAGAGGCTTATCACCTCTACAAGGTCGACAAGTTGATTTTATCATTT<br/> GCATGGCTGCCTTCTTCGGTGTTGCTTTCATAAGCATGGAAGTGGGCCTCATGA<br/> TTTCGGTTGGATTTAGTCTAGTTAGAGCACTCCTATATGTGGCAAGACCTGCAT<br/> CTTGCAAGCTTGGGAAAGTGCCAACTCAACTATATATCGTGACACGGAGCA<br/> GTATCCAGATTCAGCCGATCTCAAGGGGATCCTAGTTCTACAACCTGGTTCCCC<br/> AATTTACTTTGCCAATTCCACCTATATCAGAGAAAGGATTTTGAGGTGGATTG<br/> AGAGGAGCAGGATGTTCAAACCTTTGAAGGAAGTATTCTTGAGCATGTTTTGT<br/> TAGATTTGACAGGAGTTACATCGATCGACATTACGGGCATTGAAACGTTAATT<br/> GAAGTACGTAGAACCTTGCTAGCAAATGACATAAAGATGGCAATCATAAACC<br/> CAAGGATTAAGGTTATGGAGAAGATGATAGCTTCGAAATTCATAGACATCATT<br/> GGGAAGGAGTATGTTTTCTTGTCTATAGATGATGCAACCGAAGCTTGTCGGTTT<br/> TCGCTTCAACGGCCAAAGCCAAACGGTAAGTCTACTAGAAAGACTCCAGTA<br/> CTACTGTTGTCTAA</p> |
| JrSULTR4.1 | <p>&gt;ATGGAGATAACGTATGCATCGCCAGCTCACCCAACCTTGCGGAGTCGGACT<br/> ACTCGATGCCGACGTGACCCGGTCCGTGAAGATCATTCGGTTGCAGCACCCC<br/> AGCACGTTGCCGTCGTCTTCGTCTTCTACTTCATATCCCAGCGCAGTTCTCTCC<br/> AAATGGACGTTGAAGCTGCAGAGCATGACCTGGGTCCAGTGGATCGAGCTCT<br/> TCCTCCCCTGCTACCGTTGGATTAGGACTTACAAATGGAGGGAGTACCTTCAG<br/> ATAGATCTCATGGCTGGGACGACCGTCGGTGTCATGCTCGTCCCCCAGGCGAT<br/> GTCTTATGCAAAATTAGCTGGGCTTCAACCAATATATGGACTTTACTCTGGTTTT<br/> ATGCCTCTATTTGTGTATGCCATATTTGGTTCATCTCGTCAGTTGCAGTTGGTC<br/> CAGTAGCATTGGTTTCTCTCCTGGTTTCCAATGTCTTAAGTGAAATCGTTGATTC<br/> ATCTGATGAATTATACACAGAACTTGCAATATTGCTGGCGCTTATGGTTGGGAT<br/> ACTGGAATGCATAATGGGGCTCTTGAGGCTTGGGTGGCTTATTCGTTTCATCAG<br/> CCACTCTGTAATTTCTGGCTTTACAAGTGCCTCAGCCGTCGTGATTGCGCTATC<br/> TCAAGCAAAATACTTTTTGGGATATGATATAGAACGGAGTAGCAAGATTGTGC<br/> CATTGATTAAAAGCATCATAGCTGGGATAGATGGGTTTTTCATGGCCCCCTTTTG<br/> TAATGGGATCCATAATACTTGCAATACTTCTGGTCATGAAGCACCTGGGGAAA</p>                                                                                                                                                                                                                                                                                                                                                                                                                                                                                                                                                                                                                                                                                                                                                                                                               |

|  |                                                                                                                                                                                                                                                                                                                                                                                                                                                                                                                                                                                                                                                                                                                                                                                                                                                                                                                                                                                                                                                                                                                                                                                                                                                                                                                                                                                                                |
|--|----------------------------------------------------------------------------------------------------------------------------------------------------------------------------------------------------------------------------------------------------------------------------------------------------------------------------------------------------------------------------------------------------------------------------------------------------------------------------------------------------------------------------------------------------------------------------------------------------------------------------------------------------------------------------------------------------------------------------------------------------------------------------------------------------------------------------------------------------------------------------------------------------------------------------------------------------------------------------------------------------------------------------------------------------------------------------------------------------------------------------------------------------------------------------------------------------------------------------------------------------------------------------------------------------------------------------------------------------------------------------------------------------------------|
|  | ACAAGGAAGTACTTGCGATTCCCTGAGAGCTGCAGGTCCCCTGACAGCAGTCG<br>TTTTGGGAACAACCTTTGTGAAAATATTTAATCCCTCTTCCATATCTTTGGTAGG<br>AGGTATACCTCAGGGCCTCCCAGGATTTTCTGTACCCAAAAGTTTGGGTATGT<br>AACATCTTTGATTCCAACCTGCTCTTCTCATCACTGGTGTAGCCATATTGGAATCT<br>GTGGGGATTGCAAAAGCATTGGCAGCAAAGAATGGATACGAGTTGGATTCAA<br>ATCAAGAGTTGTTTGGTCTTGGAGTAGCCAACATTATGGGTTCAATTCTTTTCAG<br>CATACCCTACCACAGGTTCCCTTTTCTAGGTCTGCTGTGAATCATGAAAGTGGA<br>GCAAAAACCTGGCTTATCTGGCATTGTCTCCGGAACCATAATGGCTTGTGCCCTT<br>TTATTCTTGACTCCATTGTTTGAATACATACCCAGTGCGCTCTTGCTGCCATTG<br>TGATCTCTGCTGTGATGGGTCTGGTGGATTACAATGAGGCTATATTTTATGGCG<br>AGTAGATAAGAAAGATTTTCTTCTTTGGACCATTACTTGCACTACAACATTGTT<br>TCTTGGTATTGAGATCGGTGTCCTTGTGGGGTTGGTGTTCGCTTGCTTTTGTC<br>ATCCACGAATCAGCAAATCCACATATTGCTGTCTTGGGGCGTCTCCAGGCAC<br>TACTGTTTATCGAAACACTCAACAGTATCCAGAATCATACACATACAATGGAA<br>TTGTGGTGGTTCGGATTGATGCTCCTATATATTTTGCAAACATAAGTTACATAAA<br>GGAAAGGCTACGGGAATATGAAATTGTTGTTGATAGATCTACTAGTCGTGGAC<br>CGGAAGTTGAAAGAGTTTACTTCGTTATTATAGAGATGGCACCTGTAACATATA<br>TAGACTCCAGTGCTGTTCAAGCTTTGAAAGACTTGCATCAGGAGTACAAATCA<br>CGTGACATCCAGATTGCCATTTCCAATCCAAACAGAGAAGTTCTGCTCACCTT<br>ATCAAAATCTGGTGTGTTGATCTGATTGGTAAGGAGTGGTACTTTGTGAGAGT<br>GCATGATGCTGTTCAAGTTTGCCTTCAGCATGTTGAGAGTTTGAAGAAACGT<br>CTAAGACATCAGATCCTCAGCCTGATGATAAACCAAATTTATTTTCAGAGATTAT<br>GGAAACAGAGAGGGGAGGATTGGCAATTGCCAACTTGGAGTCGGGCAGTC<br>CGCAATCGGAGCCATTACTGTCCCGAAAGTCTTGA |
|--|----------------------------------------------------------------------------------------------------------------------------------------------------------------------------------------------------------------------------------------------------------------------------------------------------------------------------------------------------------------------------------------------------------------------------------------------------------------------------------------------------------------------------------------------------------------------------------------------------------------------------------------------------------------------------------------------------------------------------------------------------------------------------------------------------------------------------------------------------------------------------------------------------------------------------------------------------------------------------------------------------------------------------------------------------------------------------------------------------------------------------------------------------------------------------------------------------------------------------------------------------------------------------------------------------------------------------------------------------------------------------------------------------------------|
