# Supplementary figures and images for: Isolation and Characterization of the Sulfate Transporter Gene Family and Its Expression Pattern in Response to Selenium and Abiotic Stress in Walnuts (Juglans regia L.)
Source: MDPI journal article supplement (doi:10.3390/f15040702), 2024-04-15

**Figure S1.** Conserved motifs of JrSULTR proteins derived from the MEME Suite.

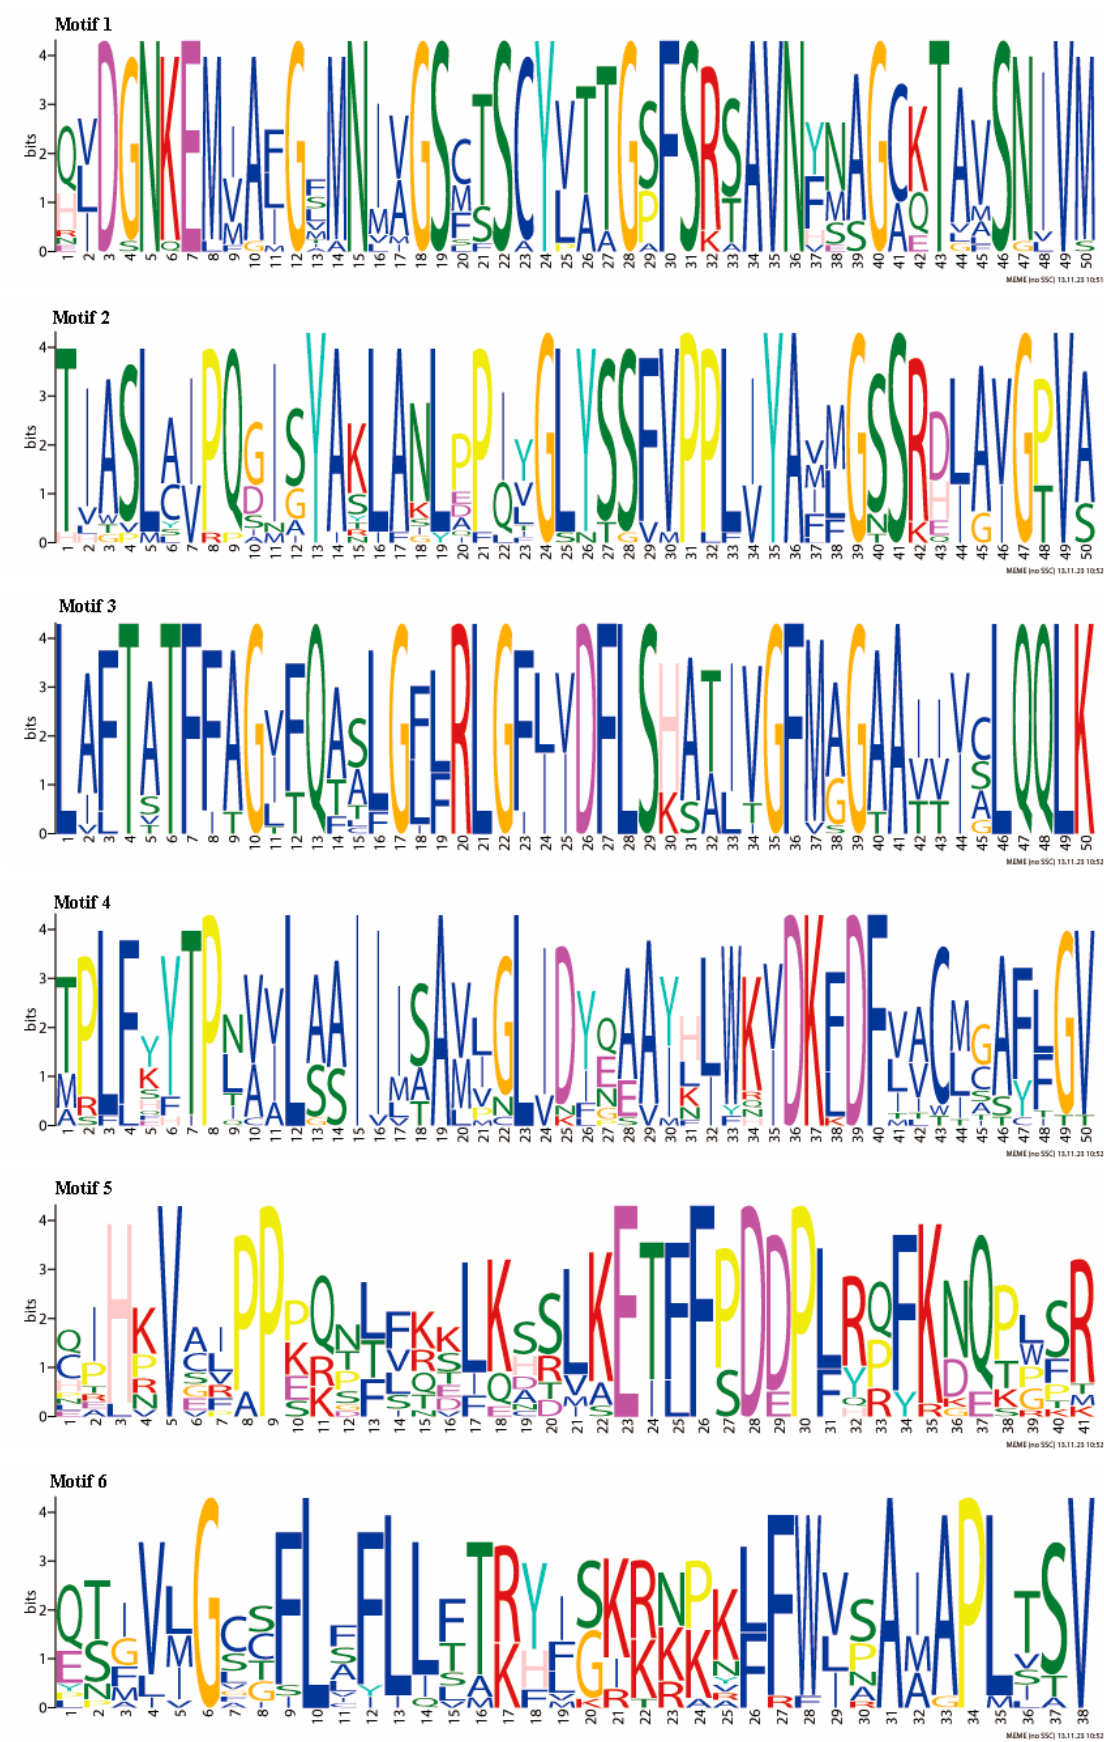

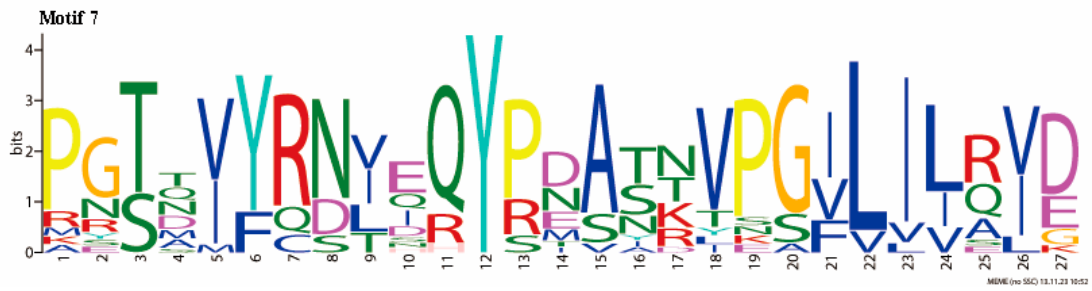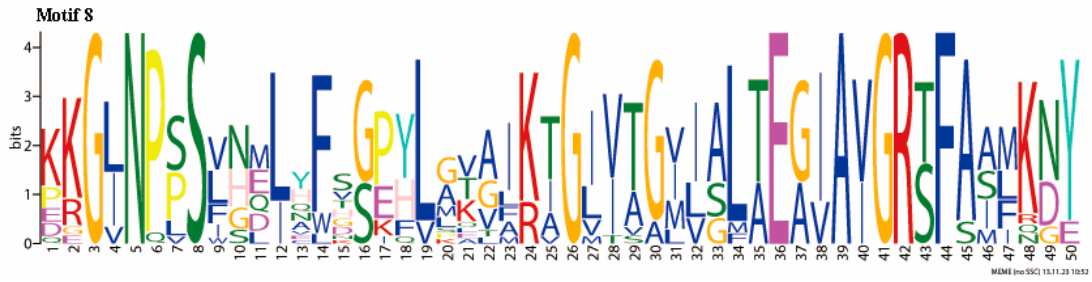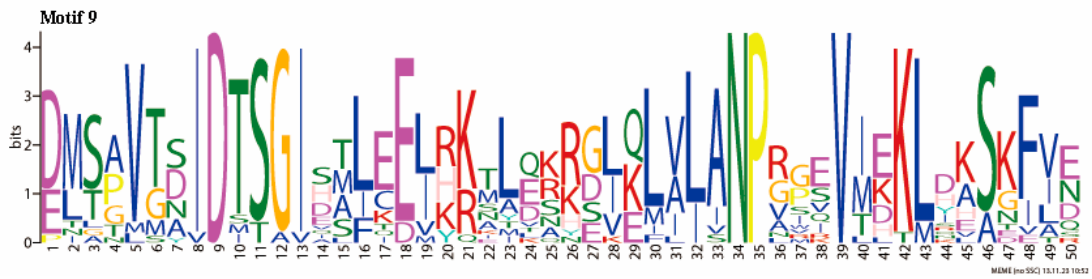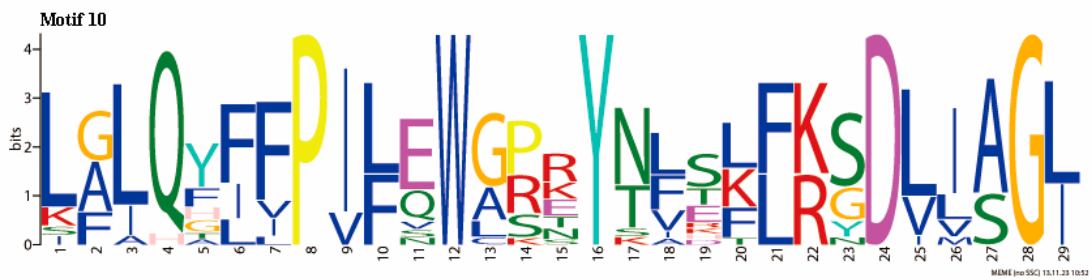

Supplement: s1 [file s1]
